1     **Rhodanese Rdl2 produces reactive sulfur species to scavenge hydroxyl radical and**  
2     **protect mitochondria**

3     Qingda Wang<sup>1†</sup>, Zhigang Chen<sup>1†</sup>, Xi Zhang<sup>1</sup>, Yuping Xin<sup>1</sup>, Yongzhen Xia<sup>1</sup>, Luying Xun<sup>1,2\*</sup>,  
4     Huaiwei Liu<sup>1\*</sup>

5     <sup>1</sup>State Key Laboratory of Microbial Technology, Shandong University, Qingdao, 266237, PR  
6     China;

7     <sup>2</sup>Department of Chemistry, School of Molecular Biosciences, Washington State University,  
8     Pullman, WA, 99164-4630, USA.

9     <sup>†</sup>These authors contribute equally to this work.

10    \*Correspondence:

11    Smith Center 519, Washington State University, Pullman, WA, 99164-7520, USA. E-mail:

12    luying\_xun@vetmed.wsu.edu. Tel: (509) 335-2787;

13    72 Binhai Road, Qingdao, 266237, People's Republic of China. E-mail:

14    liuhuaiwei@sdu.edu.cn. Tel: +86 532 58631572.

15

16

17

18

19

20

21

22

23

24

25

## 26    **Abstract**

27        During aerobic respiration, mitochondria generate superoxide anion ( $O_2^{\cdot-}$ ), hydrogen  
 28    peroxide ( $H_2O_2$ ), and hydroxyl radical ( $HO^{\cdot}$ ), and these reactive oxygen species (ROS) are  
 29    detrimental to mitochondria. Mitochondrial damage is linked to a broad spectrum of  
 30    pathologies such as Alzheimer's disease, hemochromatosis, and diabetes. Mitochondria  
 31    contain several enzymes for rapidly removing superoxide anion and hydrogen peroxide, but  
 32    how they antagonize  $HO^{\cdot}$  is elusive, representing a loophole in the anti-ROS system. Herein,  
 33    we discovered that Rhodanese 2 (Rdl2) is critical for maintaining the functionality and  
 34    integrity of mitochondria under sub-lethal ROS stress in *Saccharomyces cerevisiae*. Rdl2  
 35    converts stable sulfur species (thiosulfate and dialkyl polysulfide) to reactive sulfane sulfur  
 36    including persulfide that protects mitochondrial DNA via scavenging  $HO^{\cdot}$ . Surprisingly,  
 37    hydrogen sulfide ( $H_2S$ ) promotes  $HO^{\cdot}$  production through stimulating the Fenton reaction,  
 38    leading to increased DNA damage. Our study may reveal an *ex-ante* mean for antagonizing  
 39     $HO^{\cdot}$ , patching the loophole of the anti-ROS system in mitochondria.

40

41    *Keywords: Rhodanese, antioxidant, reactive sulfane sulfur, Fenton reaction, hydroxyl radical,*  
 42    *mitochondria health*

43

44

45

46

47

48

## 49     **Introduction**

50     Mitochondria are essential organelles in eukaryotic cells. They produce about 80% of  
 51     cellular energy via oxidative phosphorylation under oxic condition [1]. Further, they have  
 52     other key functions including heme production, iron-sulfur cluster biogenesis, and calcium  
 53     homeostasis [2]. Maintaining the functionality and integrity of mitochondria is critical for  
 54     human health, and failing to do so would lead to a broad spectrum of pathologies, such as  
 55     Alzheimer's, Parkinson's disease, hemochromatosis, atherosclerosis, carcinogenesis, and  
 56     diabetes mellitus [3-6].

57     As a hectic distribution station of metabolites, mitochondria incessantly experience many  
 58     types of stresses. A widely documented one is mediated by reactive oxygen species (ROS)  
 59     that includes the superoxide anion ( $O_2^{\bullet-}$ ), the hydrogen peroxide ( $H_2O_2$ ) and the hydroxyl  
 60     radical ( $HO^{\bullet}$ ) [7].  $O_2^{\bullet-}$  is directly produced by Complex I, III, and IV via transferring one  
 61     electron to  $O_2$ . The scavenging of  $O_2^{\bullet-}$  is conducted by superoxide dismutases (SOD), which  
 62     convert  $O_2^{\bullet-}$  to  $H_2O_2$ . GPX enzymes including peroxiredoxins, thioredoxins, and glutathione  
 63     peroxidases are the major  $H_2O_2$  scavengers [7,8]. SOD and GPX compose a major anti ROS  
 64     system in mitochondria. Albeit the existence of these enzymes, a fraction of  $H_2O_2$  still  
 65     converts to  $HO^{\bullet}$  via the Fenton reaction. Different from  $H_2O_2$ ,  $HO^{\bullet}$  is a very strong and labile  
 66     oxidant (2.33 V, at pH 7) that rapidly reacts with most organic molecules, such as DNA,  
 67     proteins, lipids, and polysaccharides, causing structural damages to mitochondria if out of  
 68     control. It is commonly believed that mitochondria only have *ex-post* means for antagonizing  
 69      $HO^{\bullet}$ —resorting to the repair systems for mending the damages [9], and no a specific enzyme

70 or compound has been assigned for specifically eliminating it. Therefore, how mitochondria  
71 maintain  $\text{HO}^\bullet$  under lethal level is a loophole in their anti ROS system.

72 In recently years, a new type of cellular compounds defined as reactive sulfane sulfur (RSS)  
73 has been discovered in both eukaryotic and prokaryotic cells [10-13]. RSS includes inorganic  
74 polysulfide ( $\text{HS}_n\text{H}$ ,  $n \geq 2$ ), organic polysulfide ( $\text{RS}_n\text{H}$ ,  $n \geq 2$ ), and polysulfane ( $\text{RS}_n\text{R}$ ,  $n \geq 2$ ) [14].

75 Although several RSS generation enzymes including cystathionine gamma-lyase,  
76 cystathionine beta-synthase, and 3-mercaptopyruvate sulfurtransferase (Mst) have been  
77 identified in cytoplasm [15,16], mitochondria are thought to be the main RSS generation  
78 organelles in mammals, where sulfide:quinone oxidoreductase (Sqr) oxidizes hydrogen  
79 sulfide ( $\text{H}_2\text{S}$ ) to RSS and excessive RSS is oxidized by persulfide dioxygenase (Pdo) to sulfite  
80 [17]. CysteinyI-tRNA synthetase 2 (Crs2) also has unspecific RSS generation function via  
81 converting cysteine to cysteine persulfide (CysSSH) in mitochondria [18]. Impairing RSS  
82 biogenesis leads to mitochondrial dysfunction, intimating a close connection between RSS  
83 biogenesis and mitochondrial health, but the underlying mechanism remains elusive [19,20].

84 *Saccharomyces cerevisiae* mitochondria have no Sqr or Pdo. In 2019, Nishimura et al.  
85 discovered that *S. cerevisiae* cysteinyI-tRNA synthetase (Crs1) is expressed via an alternative  
86 transcriptional initiation to locate into mitochondria, and hence it may pertain to  
87 mitochondrial RSS generation [21]. Recently, we found that rhodanese 1 and 2 (Rdl1 and  
88 Rdl2), members of the sulfurtransferase family, are responsible for thiosulfate assimilation in  
89 *S. cerevisiae*, and during this process, glutathione persulfide (GSSH) is formed as an  
90 intermediate [22]. Herein, we verified that rhodanese 2 (Rdl2) is the main RSS generation  
91 enzyme in mitochondria and more importantly, it is crucial for maintaining mitochondrial

health under ROS stress. Knocking out Rdl2 results in the change of mitochondrial morphology, loss of mitochondrial DNA (mitDNA), reduction of oxidative phosphorylation efficiency, and change of iron metabolism. RSS generated by Rdl2 actively scavenges HO<sup>•</sup>. Thus, an active mechanism to remove HO<sup>•</sup> might be identified.

## Materials and Methods

### *Strains and materials*

*S. cerevisiae* BY4742 (*MAT $\alpha$  his3 $\Delta$ 1 leu2 $\Delta$ 0 lys2 $\Delta$ 0 ura3 $\Delta$ 0*) and CEN.PK2 (*MAT $\alpha$ /MAT $\alpha$  ura3-52/ura3-52; trp1-289/trp1-289; leu2-3,112/leu2-3,112; his3 $\Delta$ 1/his3 $\Delta$ 1; MAL2-8C/MAL2-8C; SUC2/SUC2*) strains were cultured in yeast extract-peptone-dextrose (YPD) medium or synthetic defined (SD) medium at 30°C. The constructed mutants are listed in supplementary material (Table S1). *E. coli* DH5 $\alpha$  and BL21(DE3) strains were cultured in lysogeny broth (LB) medium at 37°C. Thiosulfate and sodium hydrosulfide (NaHS) were purchased from Sigma-Aldrich (Saint Louis, MO). Dimethyl trisulfide (MeSSSMe) and S<sub>8</sub> were purchased from TCI (Shanghai, China) Company. HS<sub>n</sub>H and GSSH were prepared following the protocol of Luebke et al [23]. Other chemicals were purchased from local companies if not specifically mentioned.

Key methods were described as below and others were provided in supplementary material (Materials and methods).

### *Subcellular Localization of Rdl1 and Rdl2.*

A GFP encoding sequence was fused to *RDL1* and *RDL2* C-termini in BY4742

114 chromosome by using the one-step PCR-mediated gene disruption method [24]. Yeast cells  
115 were collected by centrifugation (10,000g, 5 min) and diluted to 1 OD<sub>600</sub> in sterile SD  
116 medium containing 10 nM Mito Tracker Red CMSRos (Thermo Fisher, Waltham, MA). The  
117 cell suspensions were incubated at 30°C for 20 min in dark place and then washed three times  
118 to remove the extracellular CMSRos. Yeast cells were suspended in water and imaged by  
119 using a fluorescence microscope (Olympus IX83). GFP and CMSRos co-localization was  
120 analyzed.

121 To analyze the expression level of fused Rdl2-GFP in different growth phases, Microplate  
122 Reader Synergy H1 was used with  $\lambda_{ex}$  of 488 nm and  $\lambda_{em}$  of 525 nm. To analyze the expression  
123 level of fused Rdl2-GFP in the presence of H<sub>2</sub>O<sub>2</sub>, 1 OD<sub>600</sub> middle-log phase yeast cells (8 h  
124 cultivation) were treated with 5 mM H<sub>2</sub>O<sub>2</sub> at 30°C for 1 h, and then subjected to flow  
125 cytometry analysis. For each sample, 10<sup>5</sup> cells were analyzed in the FL1 channel and the  
126 average fluorescence value was recorded.

127

# 128 *Transcriptomic analysis*

129 *S. cerevisiae* strains were cultured in YPG medium until OD<sub>600</sub> reached 0.8, and then  
130 2 mM H<sub>2</sub>O<sub>2</sub> was added and the cultivation was expanded for 12 h. Cells were harvested  
131 for the omics analysis, which were performed at Shanghai Applied Protein Technology Co.,  
132 Ltd (Shanghai, China). For transcriptomic analysis, total RNA was extracted. Magnetic beads  
133 with Oligo (dT) were used to enrich mRNA and fragmentation buffer was added to randomly  
134 interrupt the mRNA. The first strand of cDNA was obtained with six-base random primers  
135 and the second strand of cDNA was synthesized by adding buffer, dNTPs and DNA

136 polymerase I. Double-stranded cDNA was purified with AMPure XP and then A-tailing and  
 137 sequencing adapters were connected. The AMPure XP beads were used for fragment size  
 138 selection and PCR enrichment was performed to obtain the final cDNA library. The library was  
 139 sequenced on Illumina NovaSeq 6000 platform. Sequencing was performed at Shanghai  
 140 Applied Protein Technology Co., Ltd. The clean data were obtained from raw data by  
 141 removing reads containing adapter, poly-N and low quality reads. The clean reads were  
 142 aligned with the genome of *S. cerevisiae* BY4742 by using HISAT2. The featureCounts  
 143 software was used to calculate the FPKM value of each gene expression in each sample.  
 144 Genes with a p-value < 0.05 and fold change > 2 were considered as significantly differentially  
 145 expressed.

146

#### 147 *Targeted metabolomics analysis*

148 For targeted metabolomics analysis, cells were harvested and quickly frozen in liquid  
 149 nitrogen. After grinding with liquid nitrogen, 60 mg cells were mixed with 1 ml methanol  
 150 acetonitrile aqueous solution (2:2:1, v/v) and vortexed for 60 s. Cells were then disrupted  
 151 using the ultra-sound method. The broken cells were placed at -20 °C for 1 h and then  
 152 centrifuged at 14,000g for 20 min at 4 °C. The obtained supernatant was subjected to  
 153 freeze-dry and then LC-MS analysis. The Waters I-class ultra performance liquid  
 154 chromatography was used and the mobile phase A was an aqueous solution with 25 mM  
 155 ammonium acetate and 25 mM ammonia (pH, 9.75). Mobile phase B was acetonitrile. Protein  
 156 sample was placed in a 4 °C autosampler, and the column temperature was set to 40 °C. The  
 157 flow rate was 0.3 mL/min, and the injection volume was 2 µL. The liquid phase gradient was

158 set as: 0-1 min, phase B at 95%; 1-14 min, B linearly changing from 95% to 65%; 14-16 min,  
159 B linearly changing from 65% to 40%; 16-18 min, B at 40%; 18-18.1 min, B linearly  
160 changing from 40% to 95%; 18.1-23 min, B at 95%. In the sample cohort, one QC sample  
161 was set every six experimental repeats to detect and evaluate the stability and repeatability of  
162 the system.

163 The AB 5500 QqQ mass spectrometer (AB SCIEX, Framingham, MA) was used for mass  
164 spectrometry analysis. The ESI source conditions were as: sheath gas temperature, 350°C; dry  
165 gas temperature, 350°C; sheath gas flow, 11 L/min; dry gas flow, 10 L/min; capillary voltage  
166 was 4000 V for positive mode and -3500 V for negative mode; nozzle voltage, 500 V; and  
167 nebulizer pressure, 30 psi. Monitor was in MRM mode and the dwell time of each MRM  
168 transition was 3 ms, and the total cycle time was 1.263 s. MRMANalyzer (R) was used to  
169 extract the original MRM data of 200 metabolites to obtain the peak area of each metabolite.  
170 Metabolites with p-value<0.05 and fold change>1.5 were considered as at significantly  
171 different levels.

172

### 173 *Mitochondria preparation and mitochondrial RSS analysis*

174 *S. cerevisiae* mitochondria were isolated using differential centrifugation as described  
175 previously [25]. The fluorescence-based probe psGFP1.1 was expressed and localized into  
176 mitochondrial matrix of BY4742 as reported previously [26]. Mitochondria containing  
177 psGFP1.1 (mit-psGFP) were isolated and treated with sulfur containing chemicals in isolation  
178 buffer (1 mM EDTA, 0.6 M sorbitol, 10 mM Tris-HCl, pH 7.4). The mixtures contained  
179 mitochondria and 400  $\mu$ M cysteine, thiosulfate, or MeSSSMe. After incubated at 30°C for 1 h,



180 treated mitochondria were centrifuged at 12,000g for 15 min and washed with isolation buffer  
181 (1 mM EDTA, 0.6 M sorbitol, 10 mM Tris-HCl, pH 7.4). Fluorescence was detected using the  
182 Synergy H1 microplate reader. The emission intensities at 515 nm excited by both 408 nm  
183 and 488 nm were recorded, and the ratio of 408/488 was used to represent the reactive sulfane  
184 sulfur level in mitochondria. Explanation of the calculation principle can be found in a  
185 previous report [26].

186

### 187 *Radical-induced pDNA cleavage assay*

188 The pDNA cleavage assay was performed following the previously reported method [27].  
189 The pBluescript II SK (+) plasmid was used as the model DNA. 25 µg/µL plasmid was mixed  
190 with 50 µM Fe<sup>2+</sup> and 50 µM H<sub>2</sub>O<sub>2</sub> in distilled water. The mixture was incubated at room  
191 temperature for 3 h and then analyzed by electrophoresis. The supercoiled (SC) and nicked  
192 circular (NC) forms of plasmid was quantified using the software FluorChem Q (Protein  
193 Simple, Inc.). SC ratio was calculated as SC/(SC+NC) and used as the DNA damage index.  
194 For testing the protection effect of Rdl2 products, Rdl2 (2.5 µM) was incubated with 1 mM  
195 thiosulfate or MeSSSMc at room temperature for 1 h, and then Rdl2 was removed using a  
196 3-kDa filter. The filtrated products were diluted with HEPES buffer (100 mM, pH 7.4) to  
197 prepare product-dilution solutions, which were added into the DNA-Fe<sup>2+</sup>-H<sub>2</sub>O<sub>2</sub> mixture and  
198 subjected to the same analysis. Thiosulfate, MeSSSMc, H<sub>2</sub>S (in the form of NaHS), S<sub>8</sub>,  
199 laboratory prepared GSSH, GSH, and L-ascorbic acid were also tested in the same conditions.

200 For testing whether H<sub>2</sub>S reduces Fe<sup>3+</sup> to promote the Fenton reaction, 25 µg/µL plasmid  
201 was incubated with 50 µM Fe<sup>3+</sup>, 50 µM H<sub>2</sub>O<sub>2</sub> and NaHS or S<sub>8</sub> (20 µM-300 µM) at room

202 temperature for 3 h. As the control, 25 µg/µL plasmid was incubated with 50 µM H<sub>2</sub>O<sub>2</sub> and  
 203 NaHS (20 µM-300 µM) at room temperature for 3 h. The untreated-plasmid DNA and the  
 204 Fenton solution-plasmid DNA mixture were also used as controls.

205

# 206 *In vitro analysis of produced H<sub>2</sub>S and reactive sulfane sulfur*

207 A modified methylene blue method [28] was used to detect the produced H<sub>2</sub>S. Briefly, 1%  
 208 zinc acetate solution (900 µL) was added into the reaction solution (100 µL) to convert H<sub>2</sub>S to  
 209 ZnS. The mixture was centrifuged at 8,000g for 5 min, and washed with deionized and  
 210 distilled water. The washing step was repeated three times. After removing the final  
 211 supernatants, deionized and distilled water (100 µL) was added to the precipitates (ZnS) and  
 212 adequately mixed. Then, the solution was incubated with 300 µL of 1% zinc acetate, 50 µL of  
 213 20 mM DPDA (N,N-dimethyl-p-phenylenediamine) and 30 mM FeCl<sub>3</sub> in 7.2 N HCl for 30  
 214 min. The samples were centrifuged at 8,000g for 5 min and transferred into 96-well plates to  
 215 measure the OD<sub>630</sub>. NaHS was used to make the standard curve.

216 Reactive sulfane sulfur was analyzed by using a previously reported method [29]. Briefly,  
 217 the sample (50 µL) was mixed with 25 mM monobromobimane (mBBBr, 5 µL) in acetonitrile  
 218 and incubated in the dark at room temperature for 30 min. An equal volume of acetic acid and  
 219 acetonitrile mixture (v/v, 1:9) was added to precipitate proteins. The precipitates were  
 220 removed via centrifugation at 12,000 g for 2 min. The obtained supernatant was subjected to  
 221 LC-ESI-MS analysis (Ultimate 3000, Burkert impact HD).

222

# 223 *Statistical Analysis*

224 Transcriptomics and targeted metabolomics analysis were performed with six parallel  
225 biological samples. The data have been deposited in <https://www.biosino.org/node/> with ID:  
226 OEP001468. Other analysis were performed with at least 3 parallel biological samples. Data  
227 are presented as mean  $\pm$  S.D.

228

## 229 **Results**

230 *Rdl2 is the main enzyme for RSS biogenesis in S. cerevisiae mitochondria*

231 To check if Crs1 was mainly responsible for generating RSS in yeast mitochondria, we  
232 expressed it in *Escherichia coli* BL21(DE3) and purified it. The enzymatic activity was  
233 examined by mixing Crs1 with PLP (pyridoxal phosphate, the cofactor) and cysteine (the  
234 substrate). The product was analyzed by using the sulfane sulfur prober 4 (SSP4) [30] and  
235 LC-MS, and only trace amounts of cysteine persulfide (Cys-SSH) were produced (Fig. 1A  
236 and supplementary material, Figure S1). Crs1 was overexpressed in *S. cerevisiae* BY4742  
237 from two different promoters, the inducible promoter  $P_{gal}$  and the constitutive promoter  $P_{tefl}$ ;  
238 neither one led to increased RSS production *in vivo* (Fig. 1B and 1C). Since knocking out  
239 Crs1 in haploid strain BY4742 is lethal, we performed the knock-out experiment in the  
240 diploid strain CEN.PK2. The Crs1 knock-out strain (*crs1*<sup>-/-</sup>) showed no detectable difference  
241 from its wild type (wt) in terms of intracellular RSS level (Fig. 1D). The above experiments  
242 suggested that Crs1's contribution to the mitochondrial RSS is limited.

243 To check whether Rdl1 and Rdl2 were mainly responsible for RSS generation in yeast  
244 mitochondria, we first investigated the locations of these two enzymes. A green fluorescent  
245 protein (GFP) was fused with Rdl1 and Rdl2 by inserting the GFP ORF into the C-termini of

246 Rdl1 and 2 ORFs in *S. cerevisiae* BY4742 genome. The Mito Tracker Red CMSRos was used  
 247 to label BY4742 mitochondria. Rdl1/2-GFP and CMSRos co-location analysis showed that  
 248 Rdl2 particularly located in mitochondria; whereas, Rdl1 mainly located in cytoplasm (Fig.  
 249 1E). We isolated intact mitochondria from BY4742 (wt) and the *RDL2* deletion ( $\Delta rdl2$ )  
 250 mutant, in which the mitochondrial RSS detection probe mit-psGFP [26] was expressed. The  
 251 wt mitochondria contained more RSS than did the  $\Delta rdl2$  counterparts, as represented by a  
 252 higher 408/488 fluorescence ratio (Fig. 2A). The isolated mitochondria were then treated with  
 253 cysteine, thiosulfate, or organic polysulfide ( $RS_nR$ ,  $n \geq 2$ )—the three potential substrates of  
 254 sulfurtransferases. The addition of cysteine caused no RSS increase, indicating that again  
 255 Crs1 did not use cysteine to produce RSS. Thiosulfate and dimethyl trisulfide (MeSSSM<sub>e</sub>)  
 256 caused 27% and 261% increases of RSS, respectively, in wt mitochondria (Fig. 2B). Whereas,  
 257 thiosulfate caused no increase, but MeSSSM<sub>e</sub> caused 66% increase of RSS in  $\Delta rdl2$   
 258 mitochondria (Fig. 2C). The *RDL2* gene was cloned and expressed in *E. coli* BL21 (DE3).  
 259 The addition of thiosulfate and MeSSSM<sub>e</sub> increased RSS in *RDL2*-expressing *E. coli*, but did  
 260 not in the *E. coli* host (Fig. 2D and 2E).

261 RSS production by Rdl2 was further tested with purified Rdl2. It produced RSS from  
 262 thiosulfate and MeSSSM<sub>e</sub> as detected with SSP4; the amount of RSS was positively  
 263 correlated to the amount of added Rdl2 (Fig. 2F and 2G). No apparent production of H<sub>2</sub>S was  
 264 detected by using a modified methylene blue method [28]. When the products of MeSSSM<sub>e</sub>  
 265 reacting with Rdl2 were derivatized by monobromobimane (mBBr) and analyzed by using  
 266 LC-MS. A major peak corresponding to mB-SS-mB was detected (supplementary material,  
 267 Figure S2A), indicating the production of hydrogen persulfide (HS<sub>2</sub>H, HS<sub>2</sub><sup>-</sup>, or S<sub>2</sub><sup>2-</sup>). A much

268 smaller peak of likely mB-SSS-mB was also observed (supplementary material, Figure S2B).  
 269 MeSSMe, but neither MeSMe nor Me-SS-mB, was detected (supplementary material, Figure  
 270 S2C), indicating that Rdl2 releases a sulfane sulfur atom from MeSSSMe to produce HS<sub>n</sub>H  
 271 and MeSSMe.

272

273 *Rdl2 is essential for maintaining mitochondrial health under sub-lethal levels of ROS*

274 Compared with wt strain, the  $\Delta rdl2$  strain showed slightly growth retardation on both a  
 275 fermentable carbon source (glucose) and a none-fermentable carbon source (glycerol). When  
 276 a sub-lethal level of H<sub>2</sub>O<sub>2</sub> was present, the  $\Delta rdl2$  strain displayed more severe growth  
 277 retardation than wt strain, especially on none-fermentable carbon source (Fig. 3A-3C),  
 278 suggesting that mitochondria were impaired in the  $\Delta rdl2$  strain.

279 A GFP ORF was fused with the mitochondrial citrate synthase 1 (Cit1) encoding gene in  
 280 genomes of both wt and  $\Delta rdl2$  strains, which were cultured in YPD medium without the  
 281 addition of H<sub>2</sub>O<sub>2</sub>. The mitochondrial morphology was observed with a laser-scanning confocal  
 282 microscope. Mitochondria in wt displayed normal morphology with mainly filamentous or  
 283 granular shape; whereas, mitochondria in the  $\Delta rdl2$  strain displayed irregular shape (Fig. 3D).  
 284 The GFP fluorescence intensity was also obviously lower in  $\Delta rdl2$  than in wt. These  
 285 phenomena indicated that mitochondria in the  $\Delta rdl2$  strain were abnormal.

286 Several mitochondria-related physiological characteristics were then examined. First, the  
 287 mitochondrial membrane potential of  $\Delta rdl2$  was lower than that of wt no matter with or  
 288 without the addition of H<sub>2</sub>O<sub>2</sub> (Fig. 3E). Second, the oxygen consumption rate of the  $\Delta rdl2$   
 289 strain was obviously lower than that of wt with or without the presence of glucose (Fig. 3F).

290 Third, the relative number of mitDNA (mitochondrial DNA normalized against nuclear DNA)  
 291 was lower in  $\Delta rdl2$  than in wt, especially in the presence of  $H_2O_2$  (Fig. 3G). These results  
 292 verified that the health of mitochondria was impaired by Rdl2 knock-out, and the impairment  
 293 made  $\Delta rdl2$  more sensitive to ROS stress.

294

295 *Systematically investigation of the physiological changes caused by knocking out Rdl2*

296 Transcriptomics and metabolomics approaches were applied to systemically analyze the  
 297 consequences of Rdl2 knock-out. Both wt and  $\Delta rdl2$  strains were treated with 2 mM  $H_2O_2$   
 298 because their physiological differences were more obvious under ROS stress. In transcriptome  
 299 level, 215 genes were downregulated and 156 genes were upregulated (fold change >2,  
 300  $p < 0.05$ ) in the  $\Delta rdl2$  strain compared to wt (Fig. 4A). For specification:

301 I) Among the 117 genes involved in glycolysis/gluconeogenesis/pentose phosphate  
 302 pathway, only 11 of them were changed at transcription level (Fig. 4B), indicating the  
 303 metabolism in cytoplasm was not severely affected by Rdl2 deletion. However, or 10  
 304 genes involved in tricarboxylic acid (TCA) cycle, 7 were downregulated and 3 were  
 305 upregulated (Fig. 4C); for 20 genes involved in fatty acid degradation, 8 of them were  
 306 downregulated (supplementary material, Figure S3); for 11 genes involved in  
 307 respiration chain, 9 of them were downregulated and 2 were upregulated (Fig. 4D);

308 II) For 13 genes involved in anti-ROS processes, 9 of them were downregulated and 4  
 309 were upregulated (Fig. 4E); for 38 genes involved in responding to DNA damage and  
 310 replication stress, 23 of them were downregulated and 15 were upregulated; for 4 genes  
 311 involved in maintaining iron homeostasis, 1 of them were downregulated and 3 were

312 upregulated (Fig. 4F).

313 Together, these results indicated that the energy generation processes that mainly happen in  
314 mitochondria were impaired, and some anti-DNA damage processes were activated by Rdl2  
315 knock-out. It is noteworthy that *OAC1*, the gene involved in TCA cycle but also responsible  
316 for thiosulfate importing into mitochondria was downregulated, implying a less thiosulfate  
317 import to mitochondria. The well-known anti-ROS genes including mitochondrial thioredoxin  
318 reductase (*TRR1*), thiol-specific peroxiredoxin (*AHP1*), and cytosolic catalase (*CTT1*) were  
319 all downregulated in  $\Delta rdl2$  strain, implying that their anti-ROS functions are not over-lapped  
320 with Rdl2 (otherwise, they should be upregulated to compensate for the loss of Rdl2 function).  
321 The upregulation of plasma membrane ferric importing/reduction enzymes (*FRE7* and *FRE1*)  
322 and the mitochondrial iron transporter (*GGC1*), together with the downregulation of  
323 mitochondrial iron-sulfur assembly enzyme (*ISU1*, which consumes reduced iron) implied  
324 that there was a lack of reduced iron ( $\text{Fe}^{2+}$ ) in mitochondria of  $\Delta rdl2$  strain.

325 For metabolomics analysis, we targeted 200 metabolites of central and energetic  
326 metabolism (supplementary material, sheet 1). Among them, 131 compounds were identified  
327 with 36 showing significant abundance change between wt and  $\Delta rdl2$  strains (fold  
328 change >1.5,  $p < 0.05$ ) (Fig. 4G). For specification:

329 I) The abundance of 23 metabolites was increased in  $\Delta rdl2$  strain compared to that of wt  
330 strain (Fig. 4H). The increase of reduced nicotinamide adenine dinucleotide (NADH)  
331 and lactic acid indicated that the consumption of NADH through the respiration chain  
332 was reduced.

333 II) The abundance of 13 metabolites was decreased in the  $\Delta rdl2$  strain compared to that of

334 wt strain, including flavin mononucleotide (FMN), the main cofactor of enzymes  
335 composing the respiration chain (Fig. 4H).

336 The metabolome included no iron, we performed iron analysis additionally. Without ROS  
337 stress, the *Δrdl2* strain contained less  $\text{Fe}^{2+}$  and more  $\text{Fe}^{3+}$  compared to wt strain. The addition  
338 of  $\text{H}_2\text{O}_2$  increased the content of  $\text{Fe}^{3+}$  and decreased the content of  $\text{Fe}^{2+}$  in wt strain (Fig. 4I).  
339 In *Δrdl2* strain, the content of  $\text{Fe}^{3+}$  was increased but content of  $\text{Fe}^{2+}$  was not by  $\text{H}_2\text{O}_2$ ,  
340 indicating that more  $\text{Fe}^{3+}$  was imported into the cell (Fig. 4I). These phenomena were in  
341 consistent with the results of transcriptomic analysis.

342

#### 343 *Rdl2-generated RSS protects DNA from hydroxyl radical-induced damage*

344 We suspected that the Rdl2-generated RSS may protect mitDNA via interfering with the  
345 Fenton reaction. To test this hypothesis, the classical radical-induced plasmid DNA (pDNA)  
346 cleavage assay [27] was performed. The principle of this assay is when  $\text{Fe}^{2+}$ ,  $\text{H}_2\text{O}_2$ , and pDNA  
347 are mixed in deionized water,  $\text{HO}^\bullet$  generated from the Fenton reaction cleaves the supercoiled  
348 plasmids (SC) and converts most of them to nicked-circular form (NC), but when a  $\text{HO}^\bullet$  or  
349  $\text{H}_2\text{O}_2$  scavenger is present, the damage to pDNA is inhibited.  $\text{Fe}^{2+}$  (50  $\mu\text{M}$ ),  $\text{H}_2\text{O}_2$  (50  $\mu\text{M}$ ),  
350 and pDNA (25  $\mu\text{g}/\mu\text{l}$ ) were used. We first tested thiosulfate and MeSSSMe (20  $\mu\text{M}$  ~ 300  $\mu\text{M}$ ),  
351 and observed no protection of SC by either one. Second, we tested the products of Rdl2 +  
352 thiosulfate and Rdl2 + MeSSSMe reactions, SC percentage was apparently increased by each  
353 one, indicating a pDNA protection effect (Fig. 5A). As two controls, laboratory prepared  
354 glutathione persulfide (GSSH, made via mixing GSH with  $\text{S}_8$ ) and  $\text{S}_8$  also showed SC  
355 protection effect (Fig. 5B and 5C). These results indicated that RSS indeed interfere with the



356 Fenton reaction.

357 RSS may function through reacting with  $\text{H}_2\text{O}_2$  to decrease the production of  $\text{HO}^\bullet$ , or  
 358 scavenging the produced  $\text{HO}^\bullet$ . We examined the  $\text{Fe}^{3+}$  production from the Fenton reaction  
 359 with or without the addition of  $\text{S}_8$ . The  $\text{Fe}^{3+}$  production from the  $\text{Fe}^{2+} + \text{H}_2\text{O}_2 + \text{S}_8$  solution  
 360 was not decreased but slightly higher than that without  $\text{S}_8$  (Fig. 5D), suggesting that  $\text{S}_8$  did not  
 361 react with  $\text{H}_2\text{O}_2$  in the Fenton solution. The slight increase in  $\text{Fe}^{3+}$  production in the presence  
 362 of  $\text{S}_8$  favorably argues that  $\text{S}_8$  reacts  $\text{HO}^\bullet$  and drives the Fenton reaction forward. We also  
 363 determined the rate constant of the  $\text{S}_8 + \text{H}_2\text{O}_2$  reaction to be  $1.04 \text{ M}^{-1}\cdot\text{s}^{-1}$  (supplementary  
 364 material, Figure S4), much lower than the reported rate constant of the Fenton reaction,  $\sim 10^3$   
 365  $\text{M}^{-1}\cdot\text{s}^{-1}$  [31], further supporting that  $\text{S}_8$  does not react with  $\text{H}_2\text{O}_2$  in the Fenton solution. GSH  
 366 and L-ascobic acid are well-known cellular antioxidants [32,33], but neither of them showed  
 367 SC DNA protection at similar concentrations to RSS ( $20 \mu\text{M} \sim 300 \mu\text{M}$ , Fig. 5E and 5F). Thus,  
 368  $\text{S}_8$  likely scavenges  $\text{HO}^\bullet$  to protect SC.

369  $\text{H}_2\text{S}$  was recognized as an endogenous antioxidant in a profound study that led the tide of  
 370  $\text{H}_2\text{S}$  related research [34]. However, we found that it promoted pDNA cleavage in the Fenton  
 371 solution (Fig. 5G), indicating it stimulates the Fenton reaction. To reveal the underlying  
 372 mechanism, we mixed  $\text{Fe}^{3+}$  (instead of  $\text{Fe}^{2+}$ ),  $\text{H}_2\text{O}_2$ , and pDNA with or without  $\text{H}_2\text{S}$ . The  
 373 pDNA cleavage was observed in the presence of  $\text{H}_2\text{S}$ , but not in its absence (Fig. 5H).  
 374 Without iron, the  $\text{H}_2\text{O}_2$  solution with  $\text{H}_2\text{S}$  showed no pDNA cleavage (Fig. 5I). These results  
 375 suggested that  $\text{H}_2\text{S}$  functions through reducing  $\text{Fe}^{3+}$  to  $\text{Fe}^{2+}$  to facilitate the Fenton reaction.  
 376 For verification, we analyzed the  $\text{Fe}^{3+}$  production from the Fenton reaction with or without  
 377  $\text{H}_2\text{S}$ , and much higher  $\text{Fe}^{3+}$  was detected from the Fenton reaction without  $\text{H}_2\text{S}$  than with  $\text{H}_2\text{S}$

(Fig. 5D). Black precipitate (FeS) was temporary produced in the  $\text{Fe}^{2+} + \text{H}_2\text{O}_2 + \text{H}_2\text{S}$  solution, but it disappeared in 2 min, indicating that  $\text{S}^{2-}$  in FeS is still available for reacting with  $\text{H}_2\text{O}_2$  and  $\text{Fe}^{3+}$ . These results suggest that  $\text{H}_2\text{S}$  enhances the Fenton reaction.

We then measured the rate constants of sulfur-containing compounds reacting with  $\text{HO}^\bullet$ .  $\text{H}_2\text{S}$  slightly descended the absorbance ratio ( $A_0/A$ ) of the  $\text{HO}^\bullet$  probe, suggesting that it actually enhanced the production of  $\text{HO}^\bullet$  (from Fenton reaction) other than scavenging it (Fig. 6A). GSH modestly reacted with  $\text{HO}^\bullet$ , represented by a relative flat curve of the absorbance ratio; whereas GSSH and  $\text{S}_8$  rapidly reacted with  $\text{HO}^\bullet$  with  $13.32 \times 10^9$  and  $8.15 \times 10^9$  rate constants, respectively (Fig. 6B). These results, again, indicated that RSS was efficient  $\text{HO}^\bullet$  scavenger.

#### *RDL2 expresses and functions in post-logarithmic phase*

The  $\Delta rdl2$  strain released less  $\text{H}_2\text{S}$  than wt strain, detected by lead acetate papers (Fig. 7A). We checked the transcription levels (obtained from the transcriptome data) of enzymes involved in  $\text{H}_2\text{S}$  production pathways. Cbs (encoding gene is *CYS3*) and Cse (encoding gene is *CYS4*) that are responsible for  $\text{H}_2\text{S}$  production from organic substrate (mainly cysteine) were up-regulated in  $\Delta rdl2$  strain (Fig. 7B). The enzymes responsible for  $\text{H}_2\text{S}$  production from inorganic substrates (sulfate and sulfite) were not significantly changed. These results suggested that  $\Delta rdl2$  strain actually has a higher  $\text{H}_2\text{S}$  productivity than wt strain, but most of the produced  $\text{H}_2\text{S}$  may be consumed in  $\text{Fe}^{3+}$  reduction, leading to a less release portion.

The intracellular ROS levels of wt and  $\Delta rdl2$  strains were compared using the DCFH-DA probe. Wt strain contained constantly lower ROS level than  $\Delta rdl2$  strain and both showed

400 increasing ROS levels with growth time expanding (Fig. 7C). When H<sub>2</sub>O<sub>2</sub> was added, ROS  
401 level in wt strain was moderately increased; whereas, ROS level in  $\Delta rdl2$  strain was sharply  
402 increased (Fig. 7C), indicating that RSS is critical for controlling the level of intracellular  
403 ROS.

404 The Rdl2-GFP expressing strain was treated with H<sub>2</sub>O<sub>2</sub>, and the expression of Rdl2-GFP  
405 was only slightly increased in high H<sub>2</sub>O<sub>2</sub> condition (> 5 mM/OD<sub>600</sub> cell) (Fig. 7D), indicating  
406 that the expression of Rdl2 might not be ROS-induced. We analyzed the expression level of  
407 Rdl2-GFP in different growth periods by flow cytometry, and observed that Rdl2 mainly  
408 expressed in post-logarithmic phases (after 12 h in YPD medium) (Fig. 7E). For confirmation,  
409 we inoculated cells of 8 h-culture (in which Rdl2 had not been expressed) onto the  
410 H<sub>2</sub>O<sub>2</sub>-containing agar medium, wt cells barely grew and  $\Delta rdl2$  cells totally did not grow.  
411 When cells of 24 h-culture were inoculated (in which Rdl2 had been expressed), wt cells grew  
412 much better while  $\Delta rdl2$  cells also showed little growth (Fig. 7F). These results indicated that  
413 the expression of Rdl2 is mainly controlled by growth related system(s) and its expression is  
414 concurrent with the accumulation of intracellular ROS.

415

## 416 Discussion

417 In this study, we verified that Rdl2 is the main RSS-generating enzyme in *S. cerevisiae*  
418 mitochondria. Rdl2 deletion resulted in RSS decrease in the mitochondria. Further, we  
419 observed that Rdl2 deletion leads to morphology change of mitochondria even without the  
420 treatment of H<sub>2</sub>O<sub>2</sub> (Fig. 3). When facing H<sub>2</sub>O<sub>2</sub> stress, Rdl2 deletion strain is more fragile with  
421 obvious changes in mitochondria. To understand the underlying mechanism, we studied the

422 Rdl2 involved reactions and found that it generates RSS via releasing sulfane sulfur atoms  
 423 from relatively stable sulfane sulfur carriers (Thiosulfate and  $RS_nR$ , Fig. 2). More importantly,  
 424 the RSS product of Rdl2 can scavenge  $HO^\bullet$  and hence protects mitochondria from  $HO^\bullet$   
 425 induced damages, such as loss of mitDNA, impair of mitochondria membrane, and  
 426 disturbance of iron homeostasis.

427 Although we detected that  $HS_nH$  is the main product of Rdl2 *in vitro*, considering the  
 428 abundance of intracellular GSH, the main product should be GSSH *in vivo* ( $GSH + S_n \rightarrow$   
 429  $GSSH + S_{n-1}$ ). It is reported that RSSH is an excellent H-atom ( $H^\bullet$ ) donor, which easily gives  
 430 its  $H^\bullet$  to alkoxyl ( $RO^\bullet$ ) with a  $\sim 10^9 M^{-1}\cdot s^{-1}$  rate constant [35]. RSSH then becomes  $RSS^\bullet$   
 431 radical, and two  $RSS^\bullet$  radicals dimerize to form one more stable RSSSSR with a  $5 \times 10^9 M^{-1}\cdot s^{-1}$   
 432 rate constant [35,36]. In contrast, the rate constant of  $HO^\bullet$  reacting with DNA is at  $10^8 M^{-1}\cdot s^{-1}$   
 433 level, at least one magnitude lower than that of RSSH giving H-atom reaction. Thus,  $RS_nH$   
 434 and  $HS_nH$  chemicals have the potential capability of scavenging  $HO^\bullet$  before it can damage  
 435 DNA *in vivo*. For  $S_n$ , it is unknown how it scavenges  $HO^\bullet$ . Possibly via donating an electron  
 436 to  $HO^\bullet$  and forming  $S_n^\bullet$  itself, then two  $S_n^\bullet$  radicals form  $S_{2n}$  that has a longer chain. Further  
 437 studies are required to elucidate the exact mechanism. It is noteworthy that although we  
 438 observed that GSH and L-ascorbic acid did not protect pDNA from the Fenton reaction even  
 439 when their concentrations were 6-fold higher than that of Fenton solution (Fig. 5E and 5F), a  
 440 previous study demonstrated that GSH did show DNA protection effect at much higher  
 441 concentration (>25 fold of Fenton solution). The authors suggested that GSH may also react  
 442 with  $HO^\bullet$  through H-atom transfer mechanism [37]. Nonetheless, GSH is a much less efficient  
 443 H-atom donor than RSS as verified previously [35,36].

444 Mitochondria antagonize ROS at three levels. The scavenging of  $O_2^{\bullet-}$  is conducted by SOD  
445 and the scavenging of  $H_2O_2$  is performed by GPX enzymes (Fig. 7). It is reported that the rate  
446 constants of GPX reactions with  $H_2O_2$  are in the range of  $10^6 \sim 10^7 M^{-1} \cdot s^{-1}$  [38,39]. Metal iron  
447 mediated-Fenton reaction is the main origin of  $HO^{\bullet}$  in mitochondria with a rate constant of  
448  $\sim 10^3 M^{-1} \cdot s^{-1}$  [31]. Considering the physiological concentrations of  $H_2O_2$  and  $Fe^{2+}$  are  $\sim 20$  nM  
449 and  $\sim 500$  nM, respectively [8], and the rate constants of  $RSS + H_2O_2$  reactions are only  $1.04$   
450  $M^{-1} \cdot s^{-1}$ — $23.76 M^{-1} \cdot s^{-1}$  [40], RSS should have no chance to react with  $H_2O_2$  in mitochondria.  
451 Thus, RSS plays antioxidation function mainly through scavenging  $HO^{\bullet}$ , as we observed that  
452 it reacts with  $HO^{\bullet}$  more rapidly than GSH. This may represent the third ROS-antagonizing  
453 level in mitochondria (Fig. 8).

454 On the other hand,  $H_2S$  has been deemed as an antioxidant in many reports [34,41,42],  
455 further studies including ours found that its reaction with  $H_2O_2$  is slow with 2<sup>nd</sup> rate constant  
456 between  $0.46 M^{-1} \cdot s^{-1}$ — $0.76 M^{-1} \cdot s^{-1}$  [40]. Considering the physiological concentration of  $H_2S$  is  
457 much lower than that of RSS [15], the reaction between  $H_2S$  and  $H_2O_2$  may not happen either  
458 *in vivo*. Herein, we found that  $H_2S$  has promoting effect on the Fenton reaction, indicating that  
459  $H_2S$  has the pro-oxidation function other than antioxidation.

460 In terms of the whole eukaryotic kingdom, there are probably four routes for mitochondria  
461 to obtain reactive sulfane sulfur: exporting from cytoplasm, generating from  $H_2S$  via Sqr,  
462 generating from cysteine via Mst or Crs2, and generating from sulfane sulfur stocks via  
463 rhodanese (Fig. 8). These routes may function with different efficiencies and in different  
464 conditions. Sqr-mediated route might be the most efficient one; however, Sqr activity is ETC  
465 (electron transport chain) dependent, hence it may function mostly in hypoxic condition.

466 Rhodanese-mediated route is oxygen independent, they may function in all conditions. For  
467 cells having no Sqr (such as *S. cerevisiae*) or whose Sqr is not active (such as neuron), the  
468 rhodanese-mediated RSS biogenesis represents a general strategy for protecting cells from  
469 HO<sup>•</sup>-induced damage.

470 In conclusion, our study has three important observations:

- 471 i. RSS has HO<sup>•</sup> scavenging function, highlighting the unparallel role of RSS among all  
472 known natural anti ROS agents.
- 473 ii. H<sub>2</sub>S stimulates the Fenton reaction, suggesting that it may promote oxidative damage,  
474 instead of being an antioxidant.
- 475 iii. Rhodaneses are critical for maintaining mitochondrial health, adding a new function for  
476 them in anti ROS besides sulfur metabolism.

477

## 478 **Acknowledgements**

479 The work was financially supported by grants from the National Key R&D Program of  
480 China (2018YFA0901200) and the National Natural Science Foundation of China  
481 (91951202).

482

## 483 **Author Contributions**

484 H. Liu and L. Xun designed the research and made plans for the experiments; Q. Wang, Z.  
485 Chen, and Y. Xin performed Rd12 related experiments; X. Zhang performed Crs1 related  
486 experiments. Y. Xia helped in data interpretation.

487

## 488     **Competing interests**

489     The authors declare no competing interests.

490

## 491     **Data availability**

492     The data that support the findings of this study are available from the corresponding author

493     upon request

494

## 495     **References**

496     [1]     S. Papa, Mitochondrial oxidative phosphorylation changes in the life span. Molecular  
497           aspects and physiopathological implications, Biochim. Biophys. Acta - Bioenerg. 1276  
498           (1996). [https://doi.org/10.1016/0005-2728\(96\)00077-1](https://doi.org/10.1016/0005-2728(96)00077-1).

499     [2]     J.B. Spinelli, M.C. Haigis, The multifaceted contributions of mitochondria to cellular  
500           metabolism, Nat. Cell Biol. 20 (2018). <https://doi.org/10.1038/s41556-018-0124-1>.

501     [3]     K. Palikaras, E. Lionaki, N. Tavernarakis, Mechanisms of mitophagy in cellular  
502           homeostasis, physiology and pathology, Nat. Cell Biol. 20 (2018).  
503           <https://doi.org/10.1038/s41556-018-0176-2>.

504     [4]     J.R. Friedman, J. Nunnari, Mitochondrial form and function, Nature. 505 (2014).  
505           <https://doi.org/10.1038/nature12985>.

506     [5]     B. Van Houten, S.E. Hunter, J.N. Meyer, Mitochondrial DNA damage induced  
507           autophagy, cell death, and disease, Front. Biosci. - Landmark. 21 (2016).  
508           <https://doi.org/10.2741/4375>.

509     [6]     J. O'Malley, R. Kumar, J. Inigo, N. Yadava, D. Chandra, Mitochondrial Stress

- 510 Response and Cancer, Trends in Cancer. 6 (2020).
- 511 <https://doi.org/10.1016/j.trecan.2020.04.009>.
- 512 [7] A.Y. Andreyev, Y.E. Kushnareva, A.N. Murphy, A.A. Starkov, Mitochondrial ROS
- 513 metabolism: 10 Years later, Biochem. 80 (2015).
- 514 <https://doi.org/10.1134/S0006297915050028>.
- 515 [8] B. D'Autréaux, M.B. Toledano, ROS as signalling molecules: Mechanisms that
- 516 generate specificity in ROS homeostasis, Nat. Rev. Mol. Cell Biol. 8 (2007).
- 517 <https://doi.org/10.1038/nrm2256>.
- 518 [9] E.G. Hrycay, S.M. Bandiera, Involvement of Cytochrome P450 in Reactive Oxygen
- 519 Species Formation and Cancer, Adv. Pharmacol. 74 (2015).
- 520 <https://doi.org/10.1016/bs.apha.2015.03.003>.
- 521 [10] N. Lau, M.D. Pluth, Reactive sulfur species (RSS): persulfides, polysulfides, potential,
- 522 and problems, Curr. Opin. Chem. Biol. 49 (2019).
- 523 <https://doi.org/10.1016/j.cbpa.2018.08.012>.
- 524 [11] J. Shen, B.J.C. Walsh, A.L. Flores-Mireles, H. Peng, Y. Zhang, Y. Zhang, J.C.
- 525 Trinidad, S.J. Hultgren, D.P. Giedroc, Hydrogen Sulfide Sensing through Reactive
- 526 Sulfur Species (RSS) and Nitroxyl (HNO) in *Enterococcus faecalis*, ACS Chem. Biol.
- 527 13 (2018). <https://doi.org/10.1021/acscchembio.8b00230>.
- 528 [12] A.A. Santos, S.S. Venceslau, F. Grein, W.D. Leavitt, C. Dahl, D.T. Johnston, I.A.C.
- 529 Pereira, A protein trisulfide couples dissimilatory sulfate reduction to energy
- 530 conservation, Science (80-. ). 350 (2015). <https://doi.org/10.1126/science.aad3558>.
- 531 [13] Y. Wang, R. Yu, L. Wu, G. Yang, Hydrogen sulfide signaling in regulation of cell



- behaviors, Nitric Oxide - Biol. Chem. 103 (2020).
- <https://doi.org/10.1016/j.niox.2020.07.002>.
- [14] M.R. Filipovic, J. Zivanovic, B. Alvarez, R. Banerjee, Chemical Biology of H<sub>2</sub>S Signaling through Persulfidation, Chem. Rev. 118 (2018).
- <https://doi.org/10.1021/acs.chemrev.7b00205>.
- [15] T. Ida, T. Sawa, H. Ihara, Y. Tsuchiya, Y. Watanabe, Y. Kumagai, M. Suematsu, H. Motohashi, S. Fujii, T. Matsunaga, M. Yamamoto, K. Ono, N.O. Devarie-Baez, M. Xian, J.M. Fukuto, T. Akaike, Reactive cysteine persulfides and S-polythiolation regulate oxidative stress and redox signaling, Proc. Natl. Acad. Sci. U. S. A. 111 (2014). <https://doi.org/10.1073/pnas.1321232111>.
- [16] Y. Kimura, Y. Toyofuku, S. Koike, N. Shibuya, N. Nagahara, D. Lefer, Y. Ogasawara, H. Kimura, Identification of H<sub>2</sub>S<sub>3</sub> and H<sub>2</sub>S produced by 3-mercaptopyruvate sulfurtransferase in the brain, Sci. Rep. 5 (2015). <https://doi.org/10.1038/srep14774>.
- [17] H. Kimura, Signalling by hydrogen sulfide and polysulfides via protein S-sulfuration, Br. J. Pharmacol. 177 (2020). <https://doi.org/10.1111/bph.14579>.
- [18] T. Akaike, T. Ida, F.Y. Wei, M. Nishida, Y. Kumagai, M.M. Alam, H. Ihara, T. Sawa, T. Matsunaga, S. Kasamatsu, A. Nishimura, M. Morita, K. Tomizawa, A. Nishimura, S. Watanabe, K. Inaba, H. Shima, N. Tanuma, M. Jung, S. Fujii, Y. Watanabe, M. Ohmuraya, P. Nagy, M. Feelisch, J.M. Fukuto, H. Motohashi, CysteinyI-tRNA synthetase governs cysteine polysulfidation and mitochondrial bioenergetics, Nat. Commun. 8 (2017). <https://doi.org/10.1038/s41467-017-01311-y>.
- [19] C.M. Quinzii, L.C. Lopez, Abnormalities of hydrogen sulfide and glutathione

- 554 pathways in mitochondrial dysfunction, J. Adv. Res. 27 (2021).
- 555 <https://doi.org/10.1016/j.jare.2020.04.002>.
- 556 [20] G. Rao, B. Murphy, A. Dey, S.K.D. Dwivedi, Y. Zhang, R.V. Roy, P. Chakraborty, R.
- 557 Bhattacharya, P. Mukherjee, Cystathionine beta synthase regulates mitochondrial
- 558 dynamics and function in endothelial cells, FASEB J. 34 (2020).
- 559 <https://doi.org/10.1096/fj.202000173R>.
- 560 [21] A. Nishimura, R. Nasuno, Y. Yoshikawa, M. Jung, T. Ida, T. Matsunaga, M. Morita,
- 561 H. Takagi, H. Motohashi, T. Akaike, Mitochondrial cysteinyl-tRNA synthetase is
- 562 expressed via alternative transcriptional initiation regulated by energy metabolism in
- 563 yeast cells, J. Biol. Chem. 294 (2019). <https://doi.org/10.1074/jbc.RA119.009203>.
- 564 [22] Z. Chen, X. Zhang, H. Li, H. Liu, Y. Xia, L. Xun, The complete pathway for
- 565 thiosulfate utilization in *Saccharomyces cerevisiae*, Appl. Environ. Microbiol. 84
- 566 (2018). <https://doi.org/10.1128/AEM.01241-18>.
- 567 [23] J.L. Luebke, J. Shen, K.E. Bruce, T.E. Kehl-Fie, H. Peng, E.P. Skaar, D.P. Giedroc,
- 568 The CsoR-like sulfurtransferase repressor (CstR) is a persulfide sensor in
- 569 *Staphylococcus aureus*, Mol. Microbiol. 94 (2014).
- 570 <https://doi.org/10.1111/mmi.12835>.
- 571 [24] J.H. Hegemann, U. Gldener, G.J. Köhler, Gene disruption in the budding yeast
- 572 *Saccharomyces cerevisiae*., Methods Mol. Biol. 313 (2006).
- 573 <https://doi.org/10.1385/1-59259-958-3:129>.
- 574 [25] C. Meisinger, N. Pfanner, K.N. Truscott, Isolation of yeast mitochondria., Methods
- 575 Mol. Biol. 313 (2006). <https://doi.org/10.1385/1-59259-958-3:033>.

- 576 [26] X. Hu, H. Li, X. Zhang, Z. Chen, R. Zhao, N. Hou, J. Liu, L. Xun, H. Liu, Developing  
577 polysulfide-sensitive gfps for real-time analysis of polysulfides in live cells and  
578 subcellular organelles, *Anal. Chem.* 91 (2019).  
579 <https://doi.org/10.1021/acs.analchem.8b04634>.
- 580 [27] A. Misak, M. Grman, Z. Bacova, I. Rezuchova, S. Hudecova, E. Ondriasova, O.  
581 Krizanova, V. Brezova, M. Chovanec, K. Ondrias, Polysulfides and products of  
582 H<sub>2</sub>S/S-nitrosoglutathione in comparison to H<sub>2</sub>S, glutathione and antioxidant Trolox are  
583 potent scavengers of superoxide anion radical and produce hydroxyl radical by  
584 decomposition of H<sub>2</sub>O<sub>2</sub>, Nitric Oxide - *Biol. Chem.* 76 (2018).  
585 <https://doi.org/10.1016/j.niox.2017.09.006>.
- 586 [28] M. Ikeda, Y. Ishima, A. Shibata, V.T.G. Chuang, T. Sawa, H. Ihara, H. Watanabe, M.  
587 Xian, Y. Ouchi, T. Shimizu, H. Ando, M. Ukawa, T. Ishida, T. Akaike, M. Otagiri, T.  
588 Maruyama, Quantitative determination of polysulfide in albumins, plasma proteins  
589 and biological fluid samples using a novel combined assays approach, *Anal. Chim.*  
590 *Acta.* 969 (2017). <https://doi.org/10.1016/j.aca.2017.03.027>.
- 591 [29] Y. Xin, H. Liu, F. Cui, H. Liu, L. Xun, Recombinant *Escherichia coli* with  
592 sulfide:quinone oxidoreductase and persulfide dioxygenase rapidly oxidises sulfide to  
593 sulfite and thiosulfate via a new pathway, *Environ. Microbiol.* 18 (2016).  
594 <https://doi.org/10.1111/1462-2920.13511>.
- 595 [30] W. Chen, C. Liu, B. Peng, Y. Zhao, A. Pacheco, M. Xian, New fluorescent probes for  
596 sulfane sulfurs and the application in bioimaging, *Chem. Sci.* 4 (2013).  
597 <https://doi.org/10.1039/c3sc50754h>.

- 598 [31] J.A. Imlay, S.M. Chin, S. Linn, Toxic DNA damage by hydrogen peroxide through the  
599 fenton reaction in vivo and in vitro, *Science* (80-. ). 240 (1988).  
600 <https://doi.org/10.1126/science.2834821>.
- 601 [32] P. Nagy, C.C. Winterbourn, Redox chemistry of biological thiols, *Adv. Mol. Toxicol.*  
602 4 (2010). [https://doi.org/10.1016/S1872-0854\(10\)04006-3](https://doi.org/10.1016/S1872-0854(10)04006-3).
- 603 [33] R.E. Beyer, The role of ascorbate in antioxidant protection of biomembranes:  
604 Interaction with vitamin E and coenzyme Q, *J. Bioenerg. Biomembr.* 26 (1994).  
605 <https://doi.org/10.1007/BF00762775>.
- 606 [34] K. Shatalin, E. Shatalina, A. Mironov, E. Nudler, H<sub>2</sub>S: A universal defense against  
607 antibiotics in bacteria, *Science* (80-. ). 334 (2011).  
608 <https://doi.org/10.1126/science.1209855>.
- 609 [35] J.P.R. Chauvin, M. Griesser, D.A. Pratt, Hydropersulfides: H-Atom Transfer Agents  
610 Par Excellence, *J. Am. Chem. Soc.* 139 (2017). <https://doi.org/10.1021/jacs.7b02571>.
- 611 [36] C.L. Bianco, T.A. Chavez, V. Sosa, S. Saund S., Q.N.N. Nguyen, D.J. Tantillo, A.S.  
612 Ichimura, J.P. Toscano, J.M. Fukuto, The chemical biology of the persulfide  
613 (RSSH)/perthiyl (RSS·) redox couple and possible role in biological redox signaling,  
614 *Free Radic. Biol. Med.* 101 (2016).  
615 <https://doi.org/10.1016/j.freeradbiomed.2016.09.020>.
- 616 [37] N. Spear, S.D. Aust, Effects of glutathione on Fenton reagent-dependent radical  
617 production and DNA oxidation, *Arch. Biochem. Biophys.* 324 (1995).  
618 <https://doi.org/10.1006/abbi.1995.9921>.
- 619 [38] M.P. Murphy, How mitochondria produce reactive oxygen species, *Biochem. J.* 417

620 (2009). <https://doi.org/10.1042/BJ20081386>.

621 [39] C. Thomas, M.M. Mackey, A.A. Diaz, D.P. Cox, Hydroxyl radical is produced via the

622 Fenton reaction in submitochondrial particles under oxidative stress: Implications for

623 diseases associated with iron accumulation, *Redox Rep.* 14 (2009).

624 <https://doi.org/10.1179/135100009X392566>.

625 [40] H. Li, H. Liu, Z. Chen, R. Zhao, Q. Wang, M. Ran, Y. Xia, X. Hu, J. Liu, M. Xian, L.

626 Xun, Using resonance synchronous spectroscopy to characterize the reactivity and

627 electrophilicity of biologically relevant sulfane sulfur, *Redox Biol.* 24 (2019).

628 <https://doi.org/10.1016/j.redox.2019.101179>.

629 [41] B. Murphy, R. Bhattacharya, P. Mukherjee, Hydrogen sulfide signaling in

630 mitochondria and disease, *FASEB J.* 33 (2019).

631 <https://doi.org/10.1096/fj.201901304R>.

632 [42] K.R. Olson, Hydrogen sulfide, reactive sulfur species and coping with reactive oxygen

633 species, *Free Radic. Biol. Med.* 140 (2019).

634 <https://doi.org/10.1016/j.freeradbiomed.2019.01.020>.

635

636

637

638

639

640

641

## 642 **Figure legends**

### 643 **Fig. 1. Activity and localization analyses of the enzymes pertaining to mitochondrial RSS**

644 **generation in *S. cerevisiae* BY4742.** A) SSP4 analysis of RSS generated by Crs1 *in vitro*.  
 645 B&C) SSP4 analysis of intracellular RSS of BY4742 containing the *opo* plasmid (as control)  
 646 and the Crs1 expression plasmid. D) SSP4 analysis of intracellular RSS of the CEN CEN.PK2  
 647 wt (*crs1*<sup>+/+</sup>) and *CRS1* knock-out (*crs1*<sup>-/-</sup>) strains. E) Localization analysis of Rdl1 and 2.  
 648 CMSRos is the Mito Tracker Red dye. Data were from three independent repeats and  
 649 represented as average  $\pm$  s.d.

650

### 651 **Fig. 2. *In vitro* and *in vivo* analysis of the Rdl2 contribution to mitochondrial RSS.** A)

652 BY4742 wt and  $\Delta$ *rdl2* strains harboring mit-psGFP were cultured in YPD medium until  
 653 OD600 reached 0.6, and then 408/488 excitation ratio of the cells was examined. B)  
 654 Mitochondria harboring mit-psGFP were isolated from BY4742 wt strain, and were treated  
 655 with 400  $\mu$ M different chemicals at 30°C for 1 h, and then 408/488 excitation ratio was  
 656 examined. The higher the ratio, the higher the RSS. C) Mitochondria harboring mit-psGFP  
 657 were isolated from BY4742  $\Delta$ *rdl2* strain, and were treated with 400  $\mu$ M different chemicals at  
 658 30°C for 1 h, and then 408/488 excitation ratio was examined. D&E) *E. coli* wt and *rdl2*  
 659 expressing strains were treated with thiosulfate and MeSSSMe. SSP4 was used to to examine  
 660 the intracellular reactive sulfane sulfur. F&G) Purified Rdl2 was mixed with its substrates and  
 661 the products were analyzed using SSP4. Data were from three independent repeats. \*  
 662 represents difference (p<0.05) and \*\* represents significant difference (p<0.01) in two-sided  
 663 t-test. Data were from three independent repeats and represented as average  $\pm$  s.d

664

665 **Fig. 3. Examination of the role of Rdl2 in maintaining mitochondrial health under ROS**

666 **stress.** A) BY4742 wt and  $\Delta rdl2$  strains were cultivated in SD or YPG agar plates. 2 mM  
667  $H_2O_2$  was added. B&C) BY4742 wt and  $\Delta rdl2$  strains were cultivated in SD or YPG liquid  
668 medium. 2 mM  $H_2O_2$  was added. D) Mitochondrial morphology analysis of BY4742 wt and  
669  $\Delta rdl2$  strains. The strains containing Cit1-GFP were cultivated in YPD medium to log phase  
670 without  $H_2O_2$  treatment. Images were captured with the laser confocal microscope LMS900.  
671 E) Mitochondrial membrane potential analysis of wt and  $\Delta rdl2$  strains. F) Oxygen  
672 consumption analysis of wt and  $\Delta rdl2$  strains. G) mit-DNA analysis of wt and  $\Delta rdl2$  strains.  
673 Embedded figure: the strains were treated with 2 mM  $H_2O_2$ . Data were calculated from three  
674 independent repeats.

675

676 **Fig. 4. Transcriptomics and targeted metabolomics analysis of BY4742 wt and  $\Delta rdl2$**

677 **strains under the stress of 2 mM  $H_2O_2$ .** A-F) Genes changed at transcriptional level. G&H)  
678 Concentration changed metabolites. I) intracellular iron analysis. Transcriptomics and  
679 targeted metabolomics analysis were performed with six parallel biological samples. Iron  
680 analysis data were calculated from three independent repeats.

681

682 **Fig. 5. Plasmid DNA cleavage and Fenton reaction assays performed with Rdl2 products**

683 **and different chemicals.** Upper figure shows the gel electrophoresis results of pDNA and  
684 lower figure shows the percentage of pDNA in SC form. A) 1, untreated pDNA; 2, pDNA  
685 treated with Fenton reagents (50  $\mu M$   $Fe^{2+}$  and 50  $\mu M$   $H_2O_2$ ); 3, pDNA treated with Fenton

686 reagents and thiosulfate (300  $\mu$ M); 4, pDNA treated with Fenton reagents and products from  
 687 Rdl2 + thiosulfate reaction (10 fold-dilution); 5, pDNA treated with Fenton reagents and  
 688 products from Rdl2 + thiosulfate reaction (2.5 fold dilution); 6, pDNA treated with Fenton  
 689 reagents and MeSSSMe (300  $\mu$ M); 7, pDNA treated with Fenton reagents and products from  
 690 Rdl2 + MeSSSMe reaction (10 fold-dilution); 8, pDNA treated with Fenton reagents and  
 691 products from Rdl2 + MeSSSMe reaction (2.5 fold-dilution). B,C,E,F,&G) 1, untreated  
 692 pDNA; 2, pDNA treated with Fenton reagents; 3-n, pDNA treated with Fenton reagents and  
 693 tested chemicals (20  $\mu$ M-300  $\mu$ M). D)  $\text{Fe}^{3+}$  production from the Fenton reaction. CK is the  
 694 mixture of 500  $\mu$ M  $\text{Fe}^{2+}$  + 500  $\mu$ M  $\text{H}_2\text{O}_2$ ; 500  $\mu$ M  $\text{S}_8$  or  $\text{H}_2\text{S}$  was added. H) 1, untreated  
 695 pDNA; 2, pDNA treated with 50  $\mu$ M  $\text{Fe}^{3+}$  + 50  $\mu$ M  $\text{H}_2\text{O}_2$ ; 3-7, pDNA treated with 50  $\mu$ M  $\text{Fe}^{3+}$ ,  
 696 50  $\mu$ M  $\text{H}_2\text{O}_2$ , and  $\text{H}_2\text{S}$  (20  $\mu$ M-300  $\mu$ M). I) 1, untreated pDNA; 2, pDNA treated with 50  $\mu$ M  
 697  $\text{H}_2\text{O}_2$ ; 3-7, pDNA treated with 50  $\mu$ M  $\text{H}_2\text{O}_2$  and  $\text{H}_2\text{S}$  (20  $\mu$ M-300  $\mu$ M). The SC percentage  
 698 data were calculated from three independent repeats.

699

700

701 **Fig. 6. Kinetic analysis of  $\text{HO}^\bullet$  radical scavenging activity of certain compounds using**  
 702 **the modified CUPRAC method.** A) Kinetic plots measured using the  $\text{HO}^\bullet$  probe  
 703 3,5-dimethoxybenzoate. B) Rate constants calculated from the kinetic plots. Details of the  
 704 CUPRAC method was described in supporting material.

705

706 **Fig. 7. *In vitro* analysis of the interaction between Rdl2 and ROS.** A)  $\text{H}_2\text{S}$  release  
 707 detection using lead acetate papers. The strains were cultivated in SD medium for 80 h. B)



708 Transcription levels of enzymes involved in H<sub>2</sub>S production pathways. Data were from  
 709 transcriptomic analysis. The bar represent the average readcount of 6 parallel biological  
 710 samples. C) Analysis of the intracellular ROS of BY4742 wt and *Δrdl2* strains. D) The  
 711 expression of Rdl2-GFP was only slightly increased in high H<sub>2</sub>O<sub>2</sub> condition (5 mM). E) The  
 712 expression of Rdl2-GFP was different at different growth phases. F) BY4742 wt cells of  
 713 stationary phase were more resistant to H<sub>2</sub>O<sub>2</sub> than mid-log phase cells. Data were from three  
 714 independent repeats and represented as average ± s.d

715

716 **Fig. 8. Schematic representation of the mitochondrial RSS biogenesis routes and**  
 717 **functions.** *S. cerevisiae* mitochondria contain no Sqr or Mst. Rdl2 is the only enzyme that  
 718 generates RSS, which can scavenge HO<sup>•</sup>.

719

720

**A**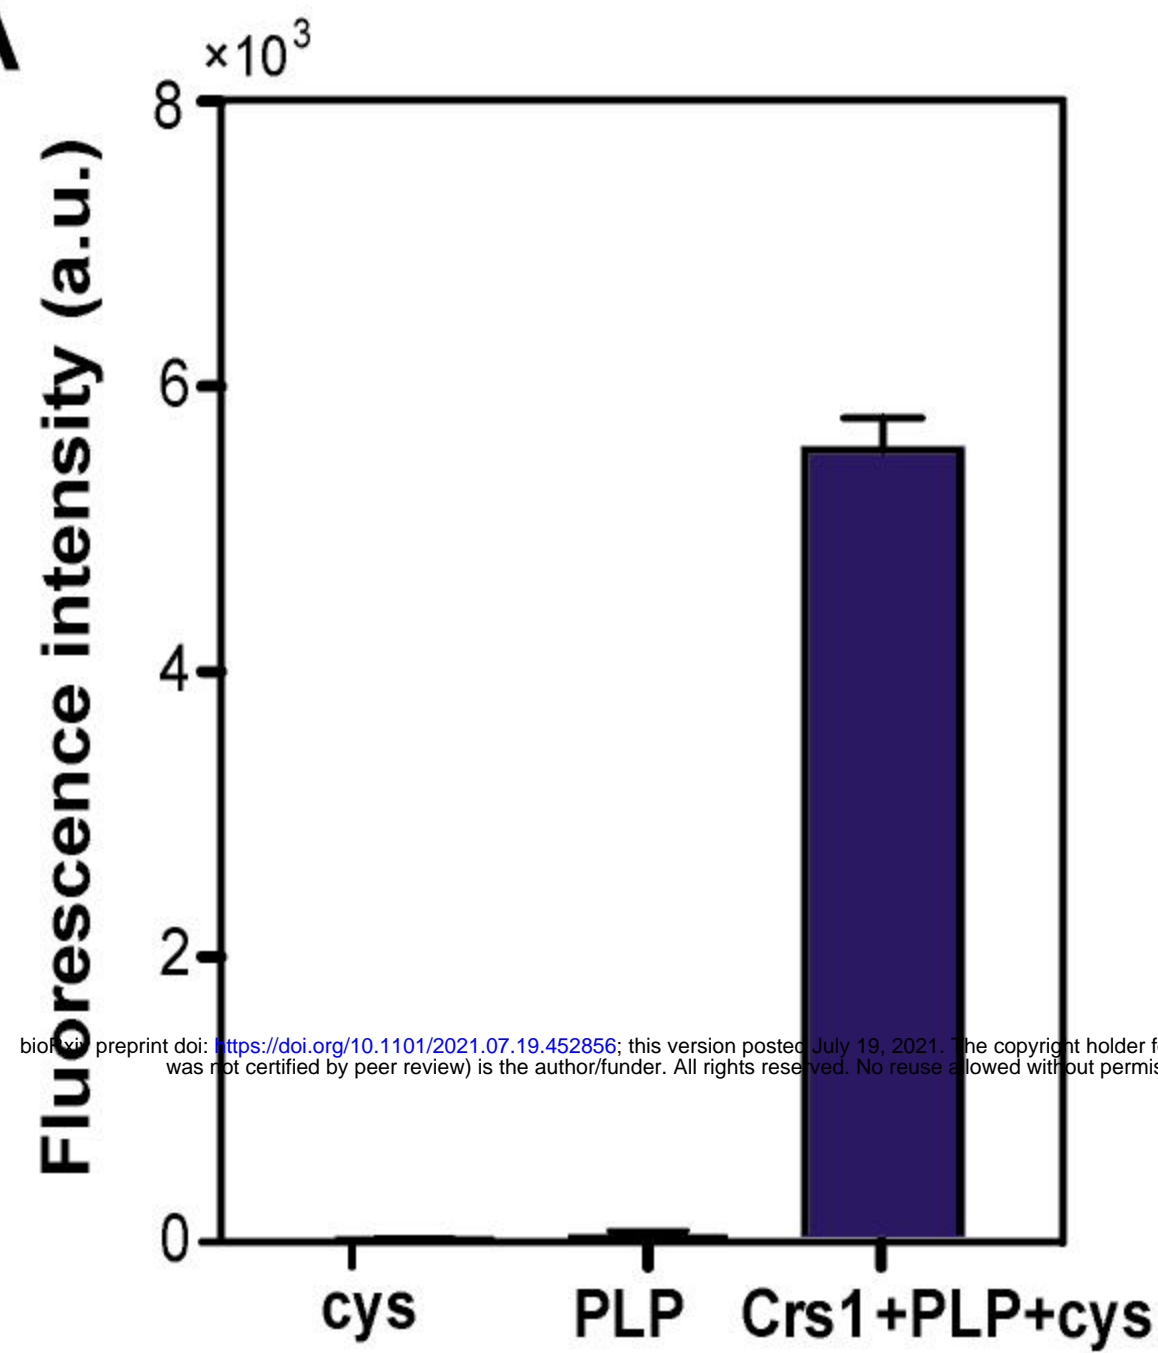**B**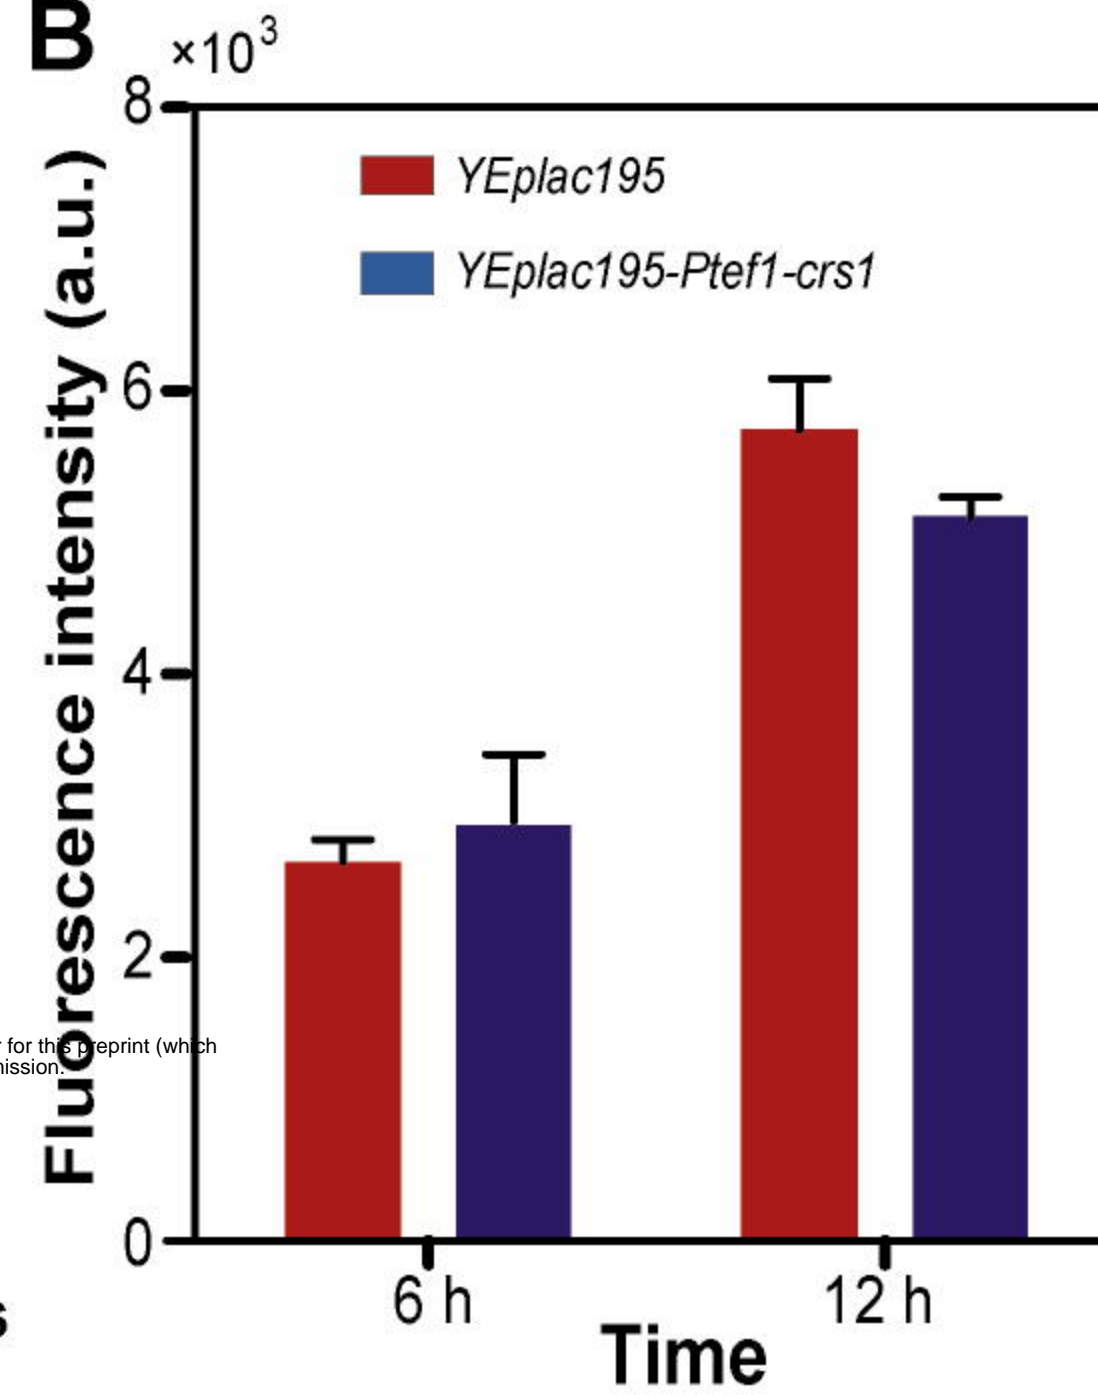**C**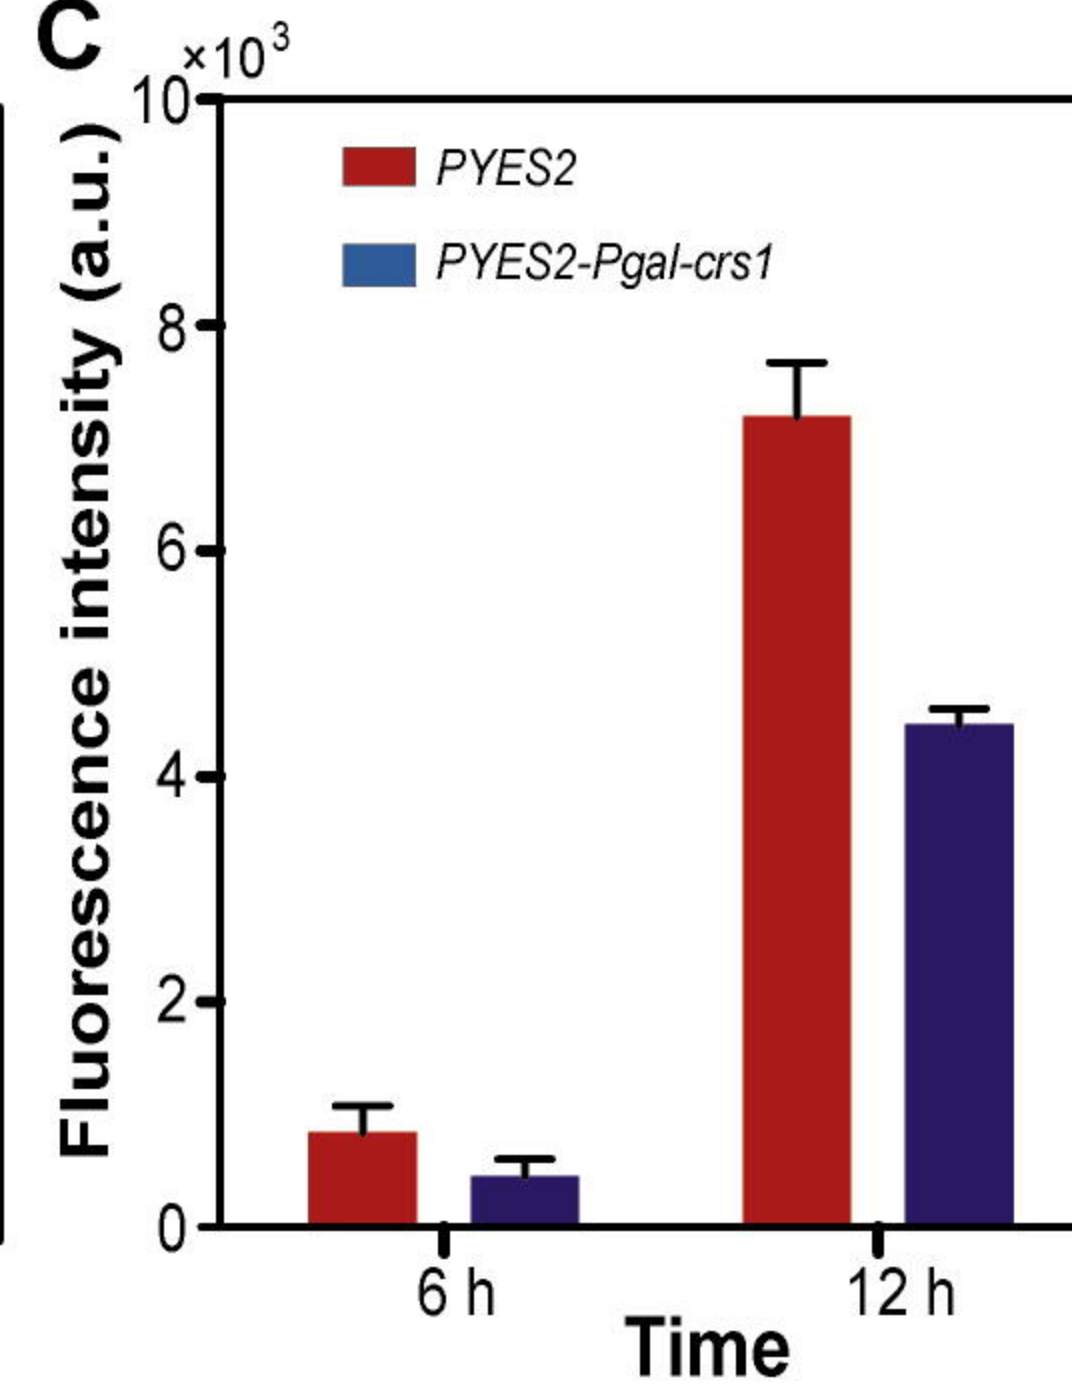**D**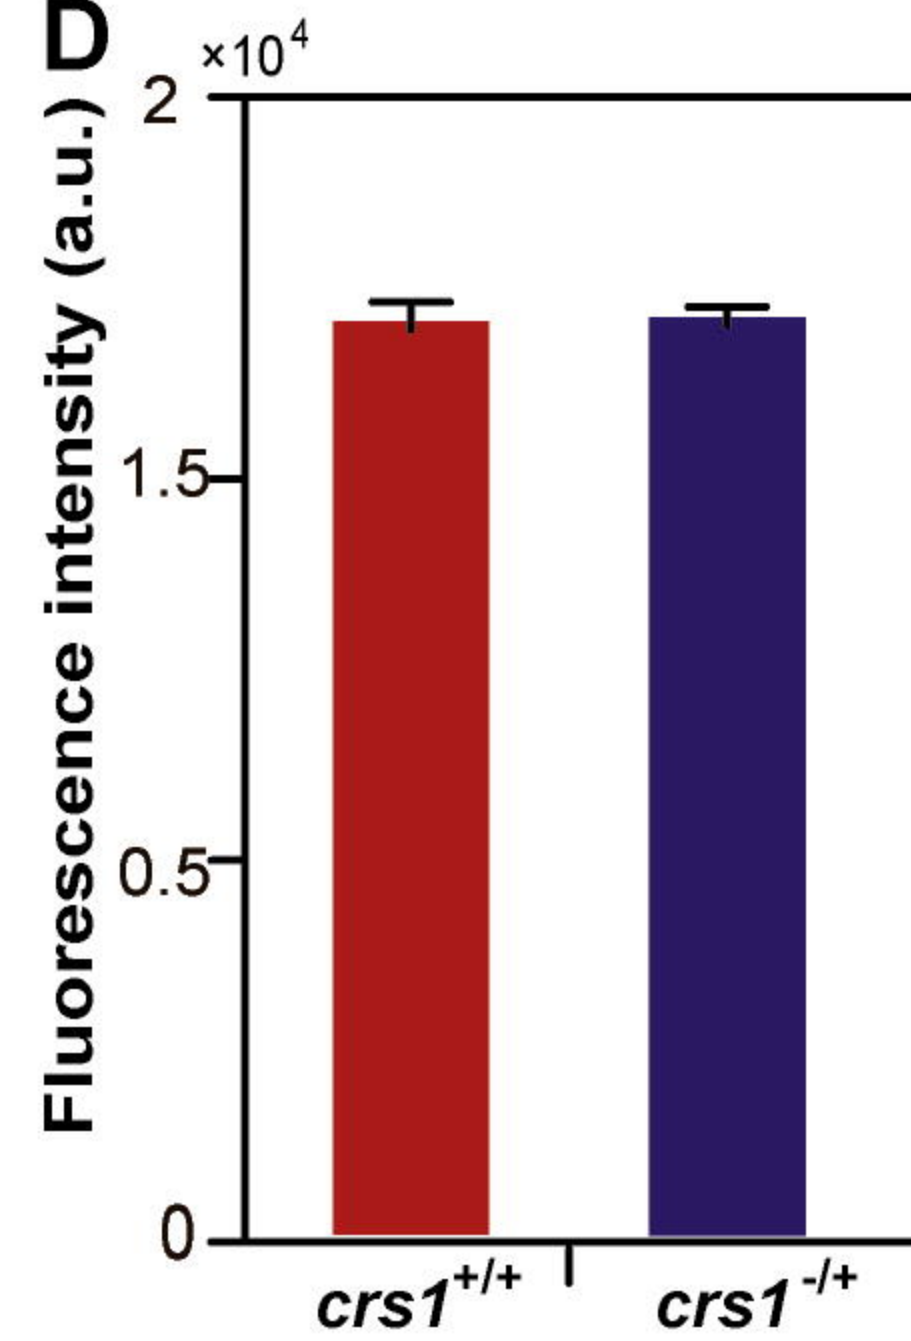**E**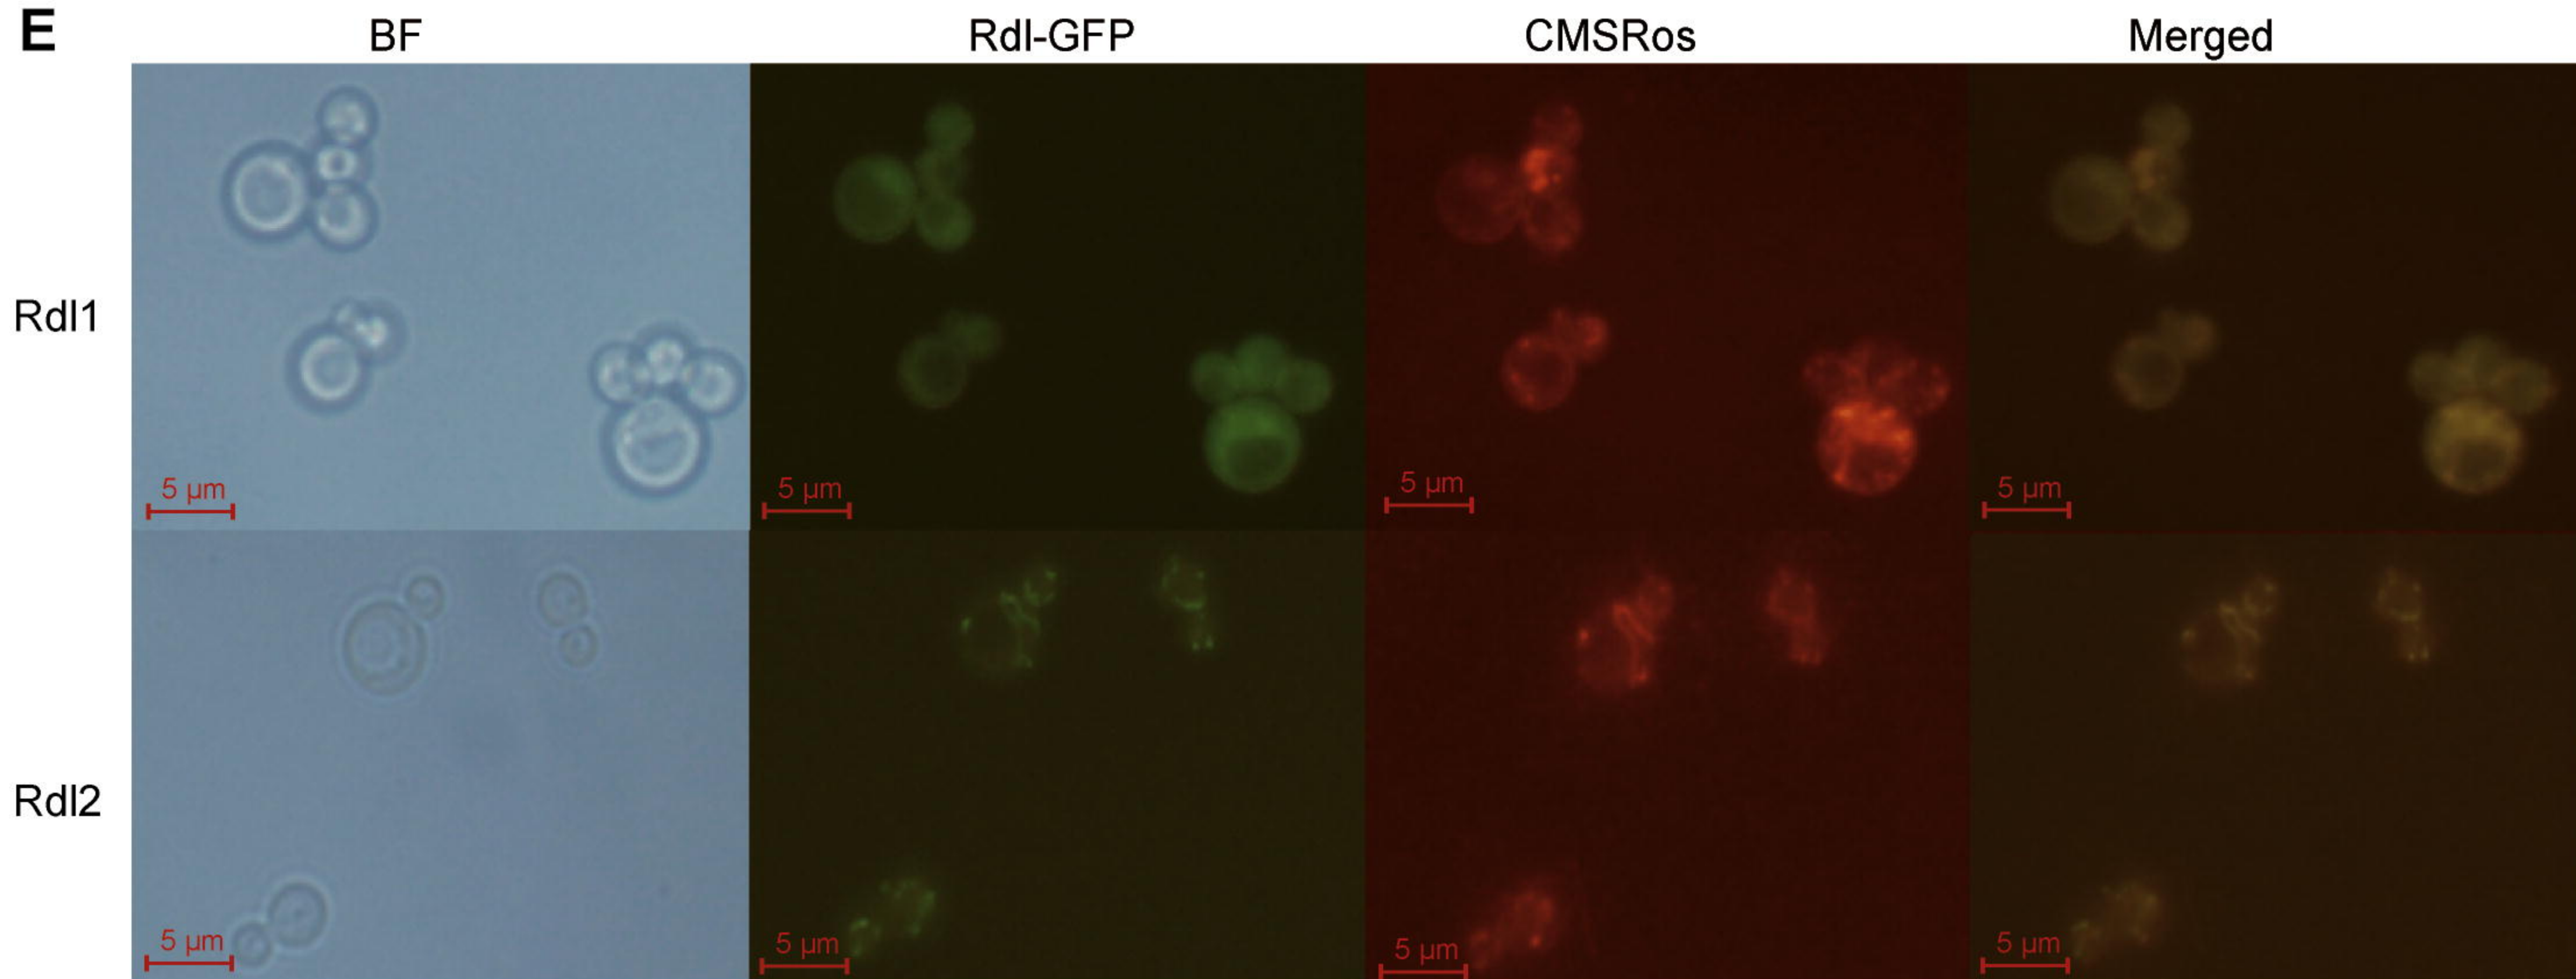



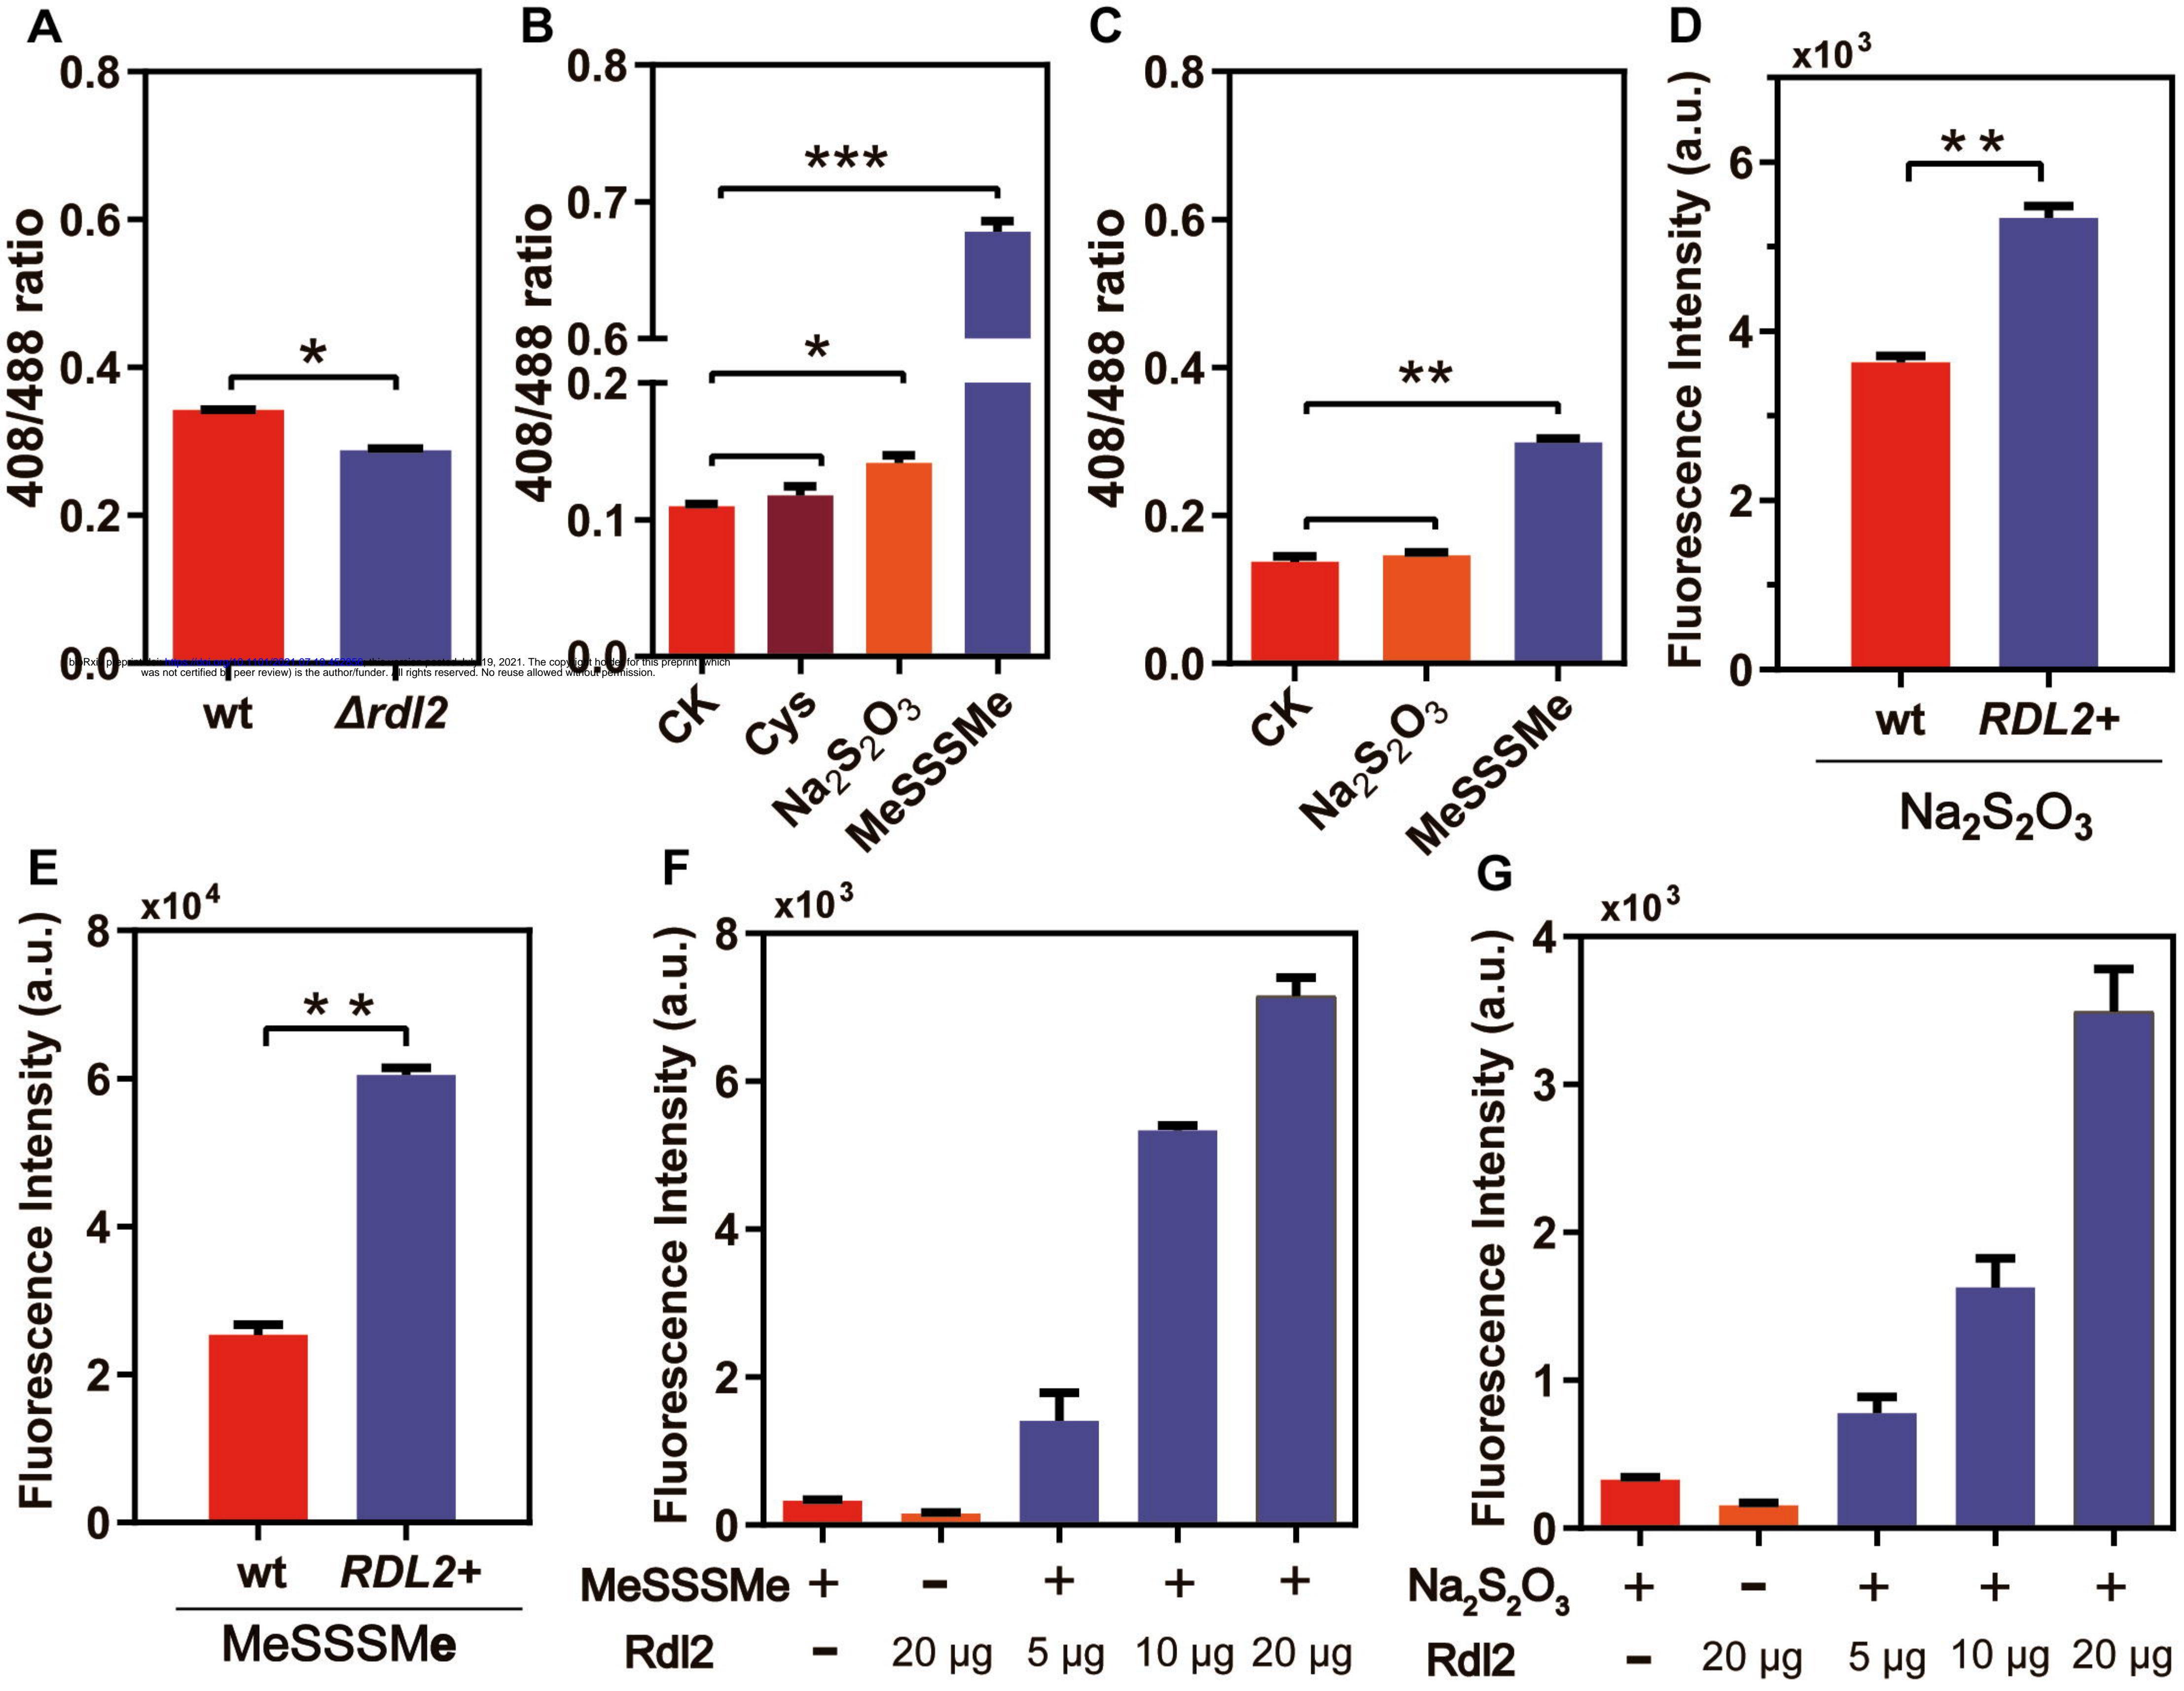



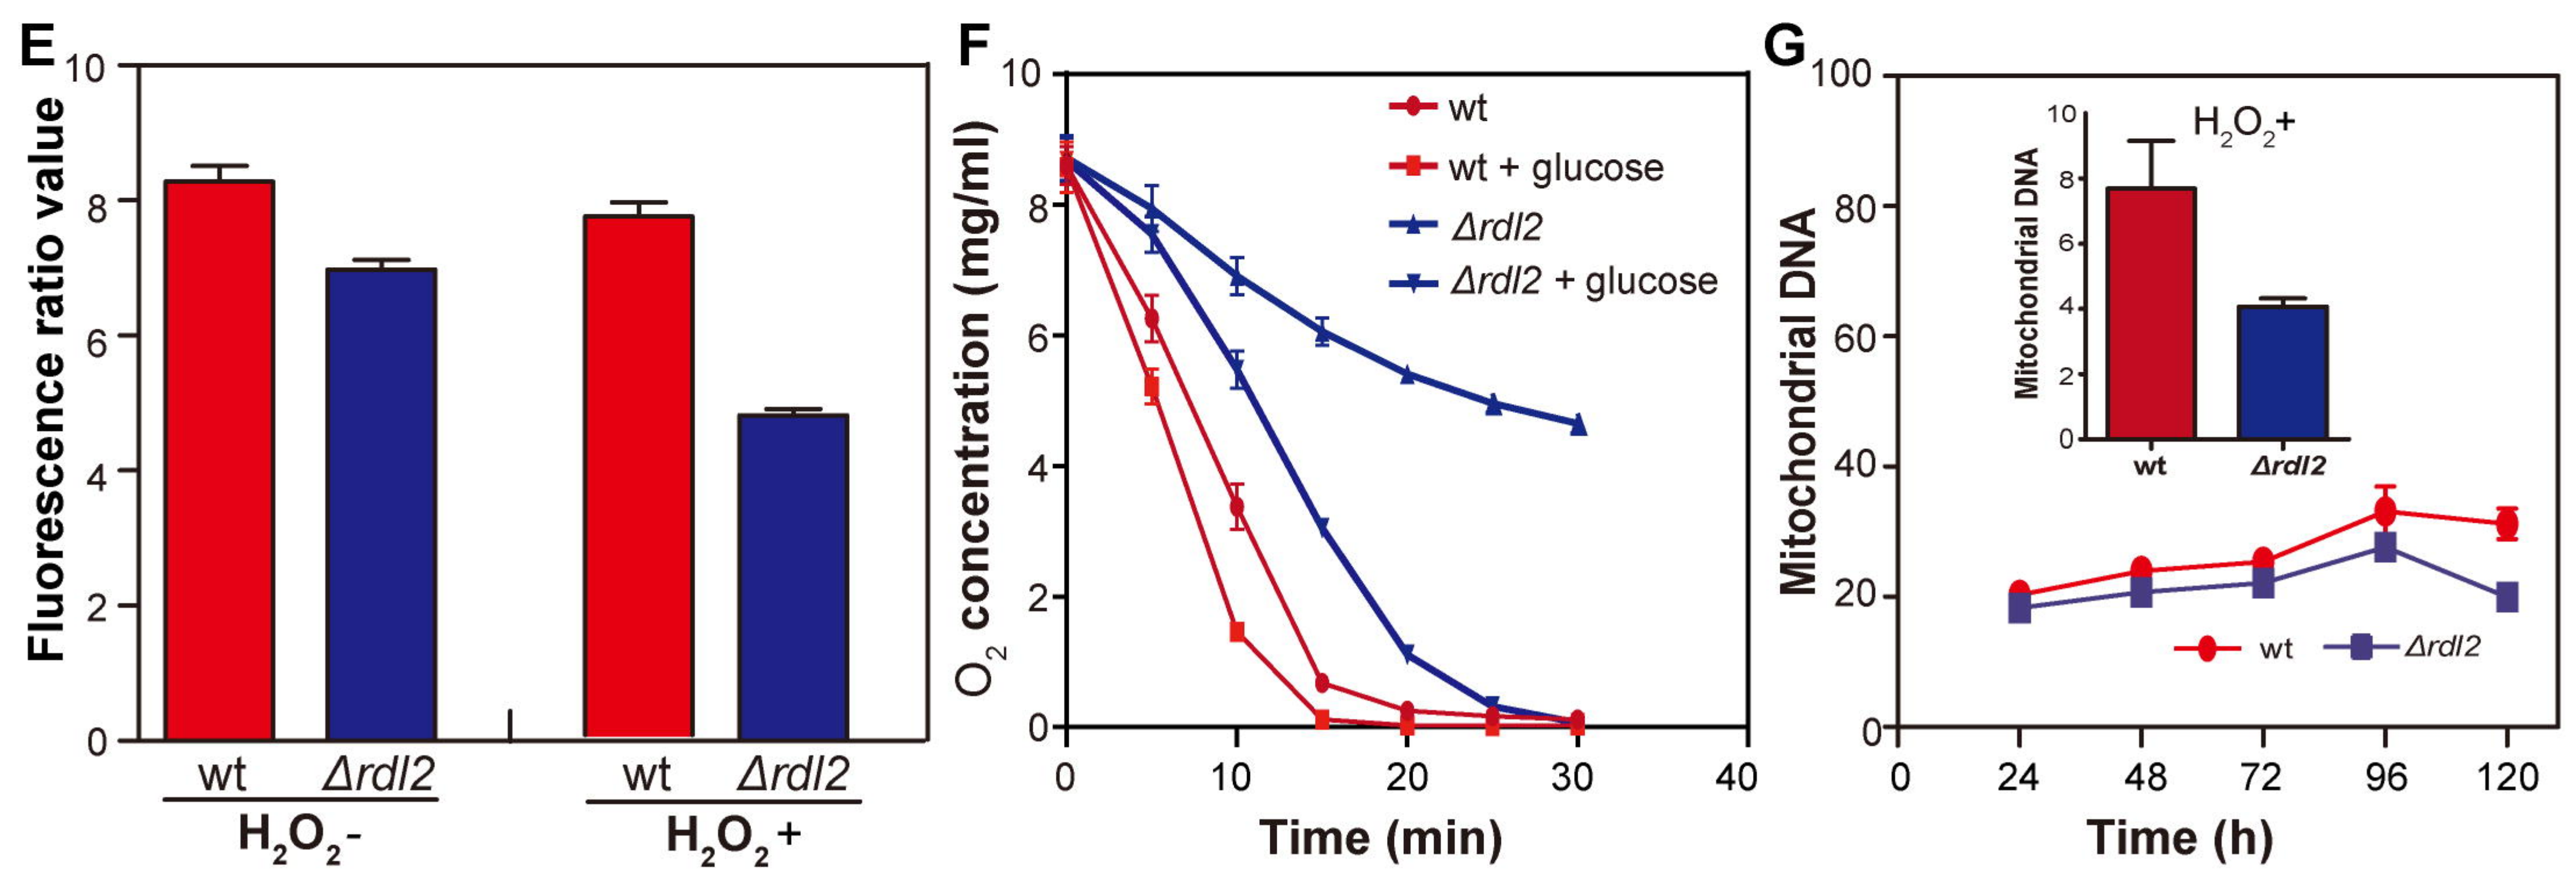



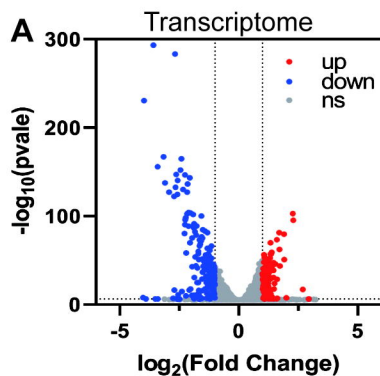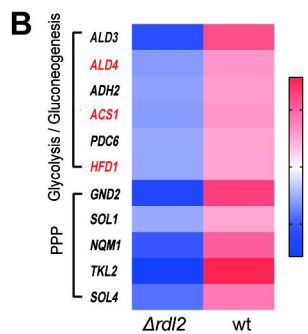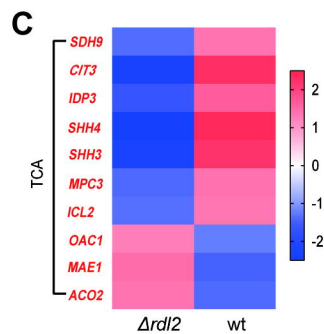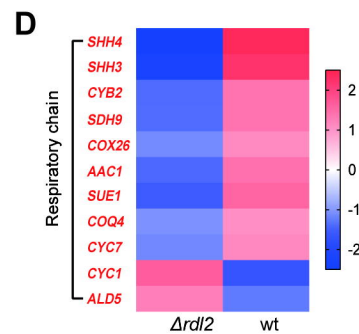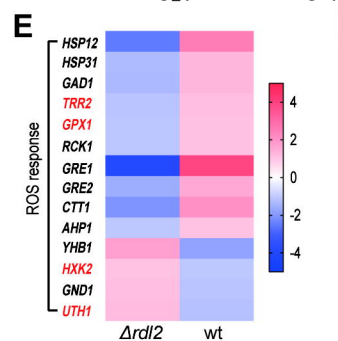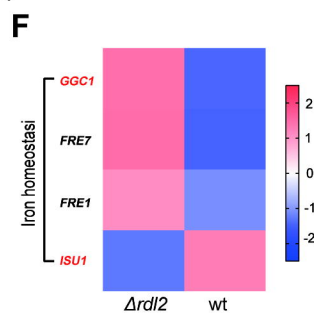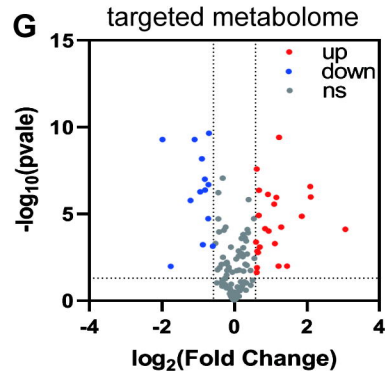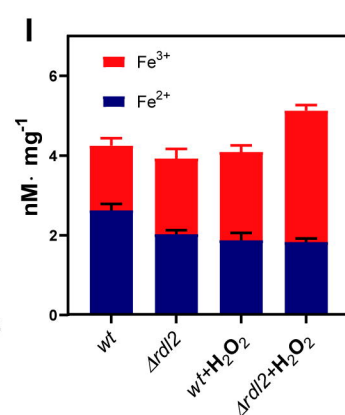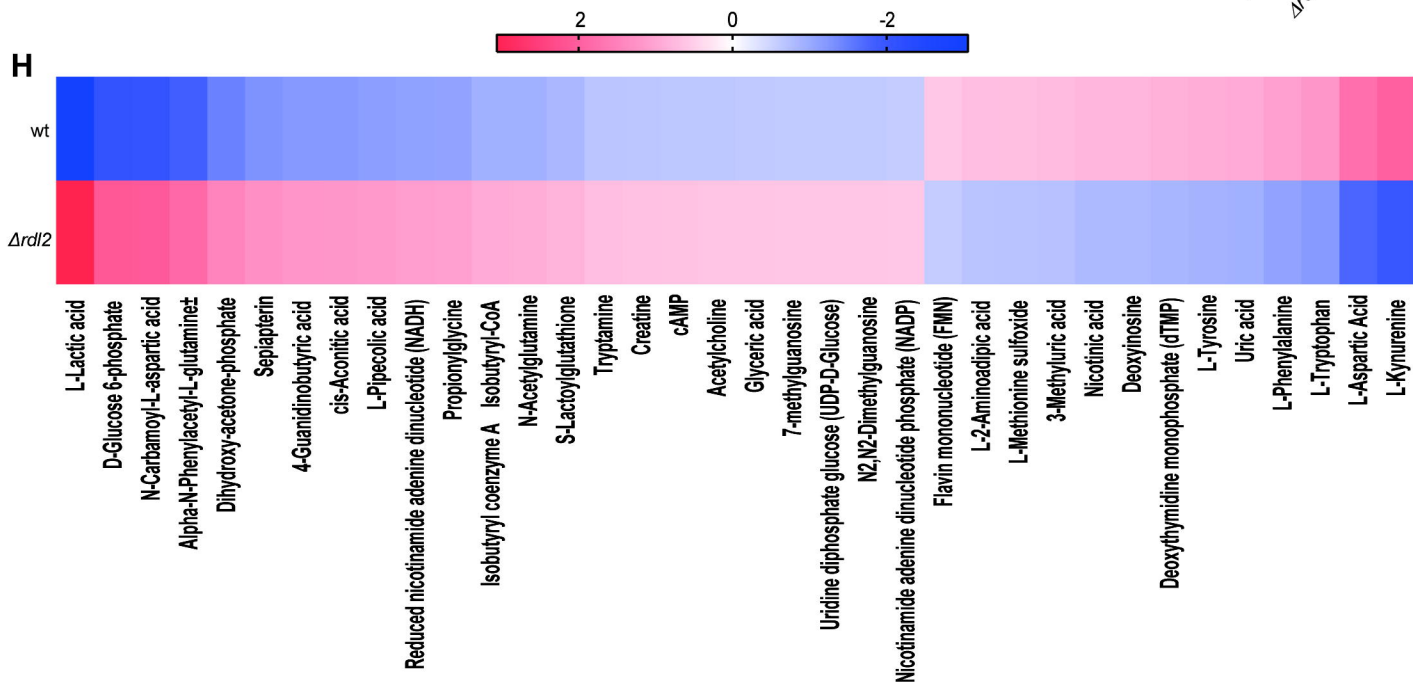



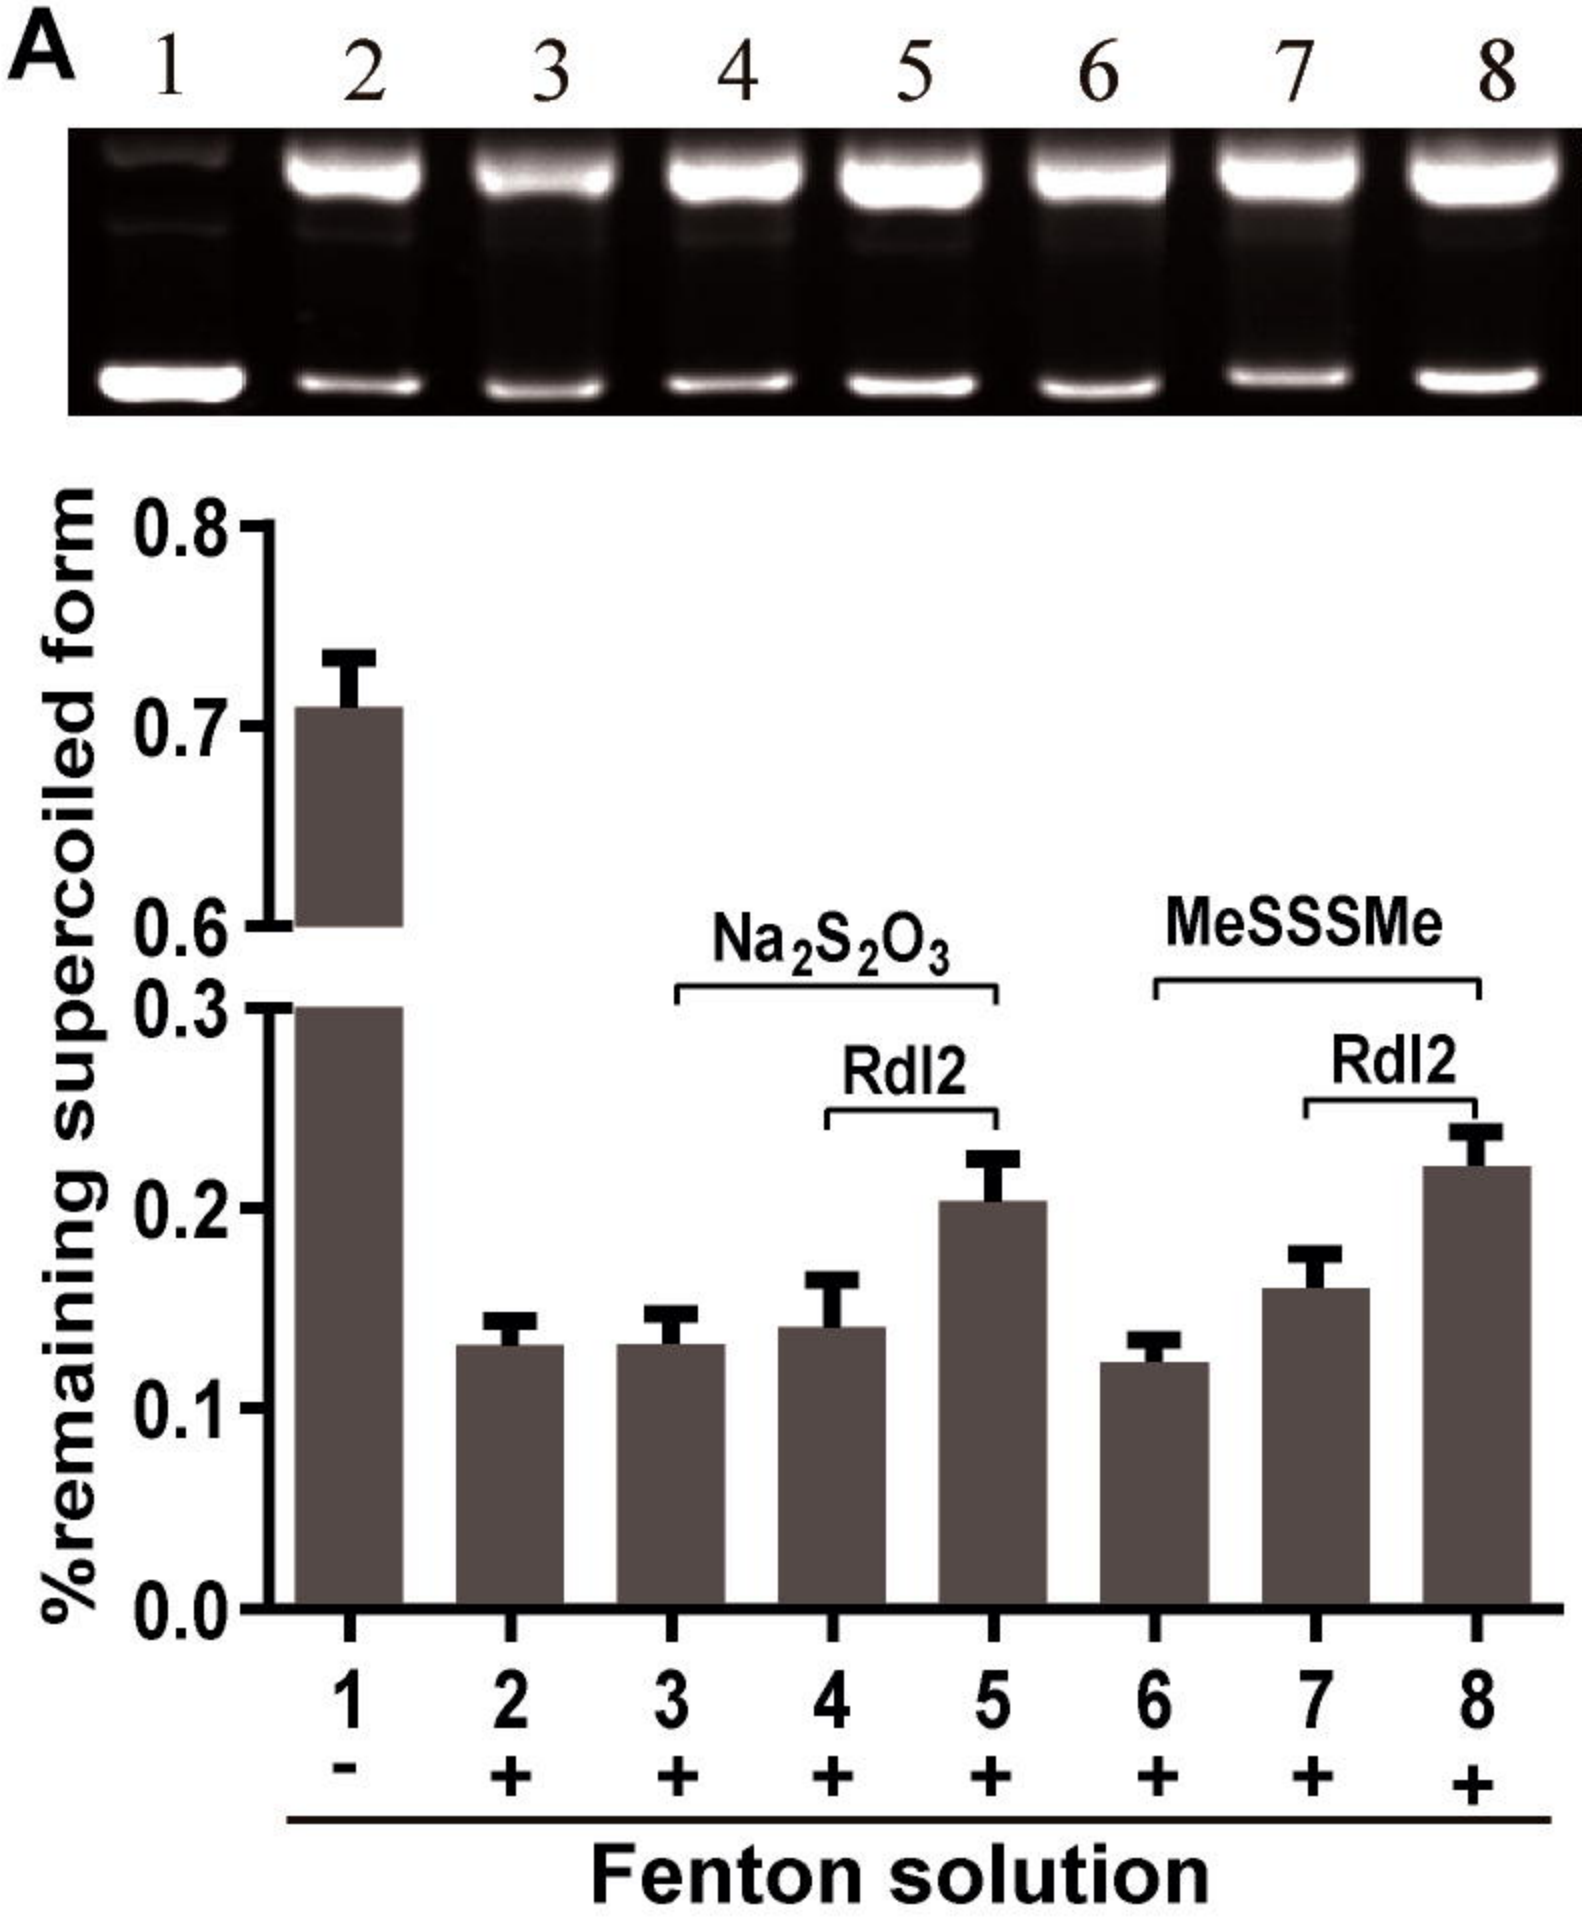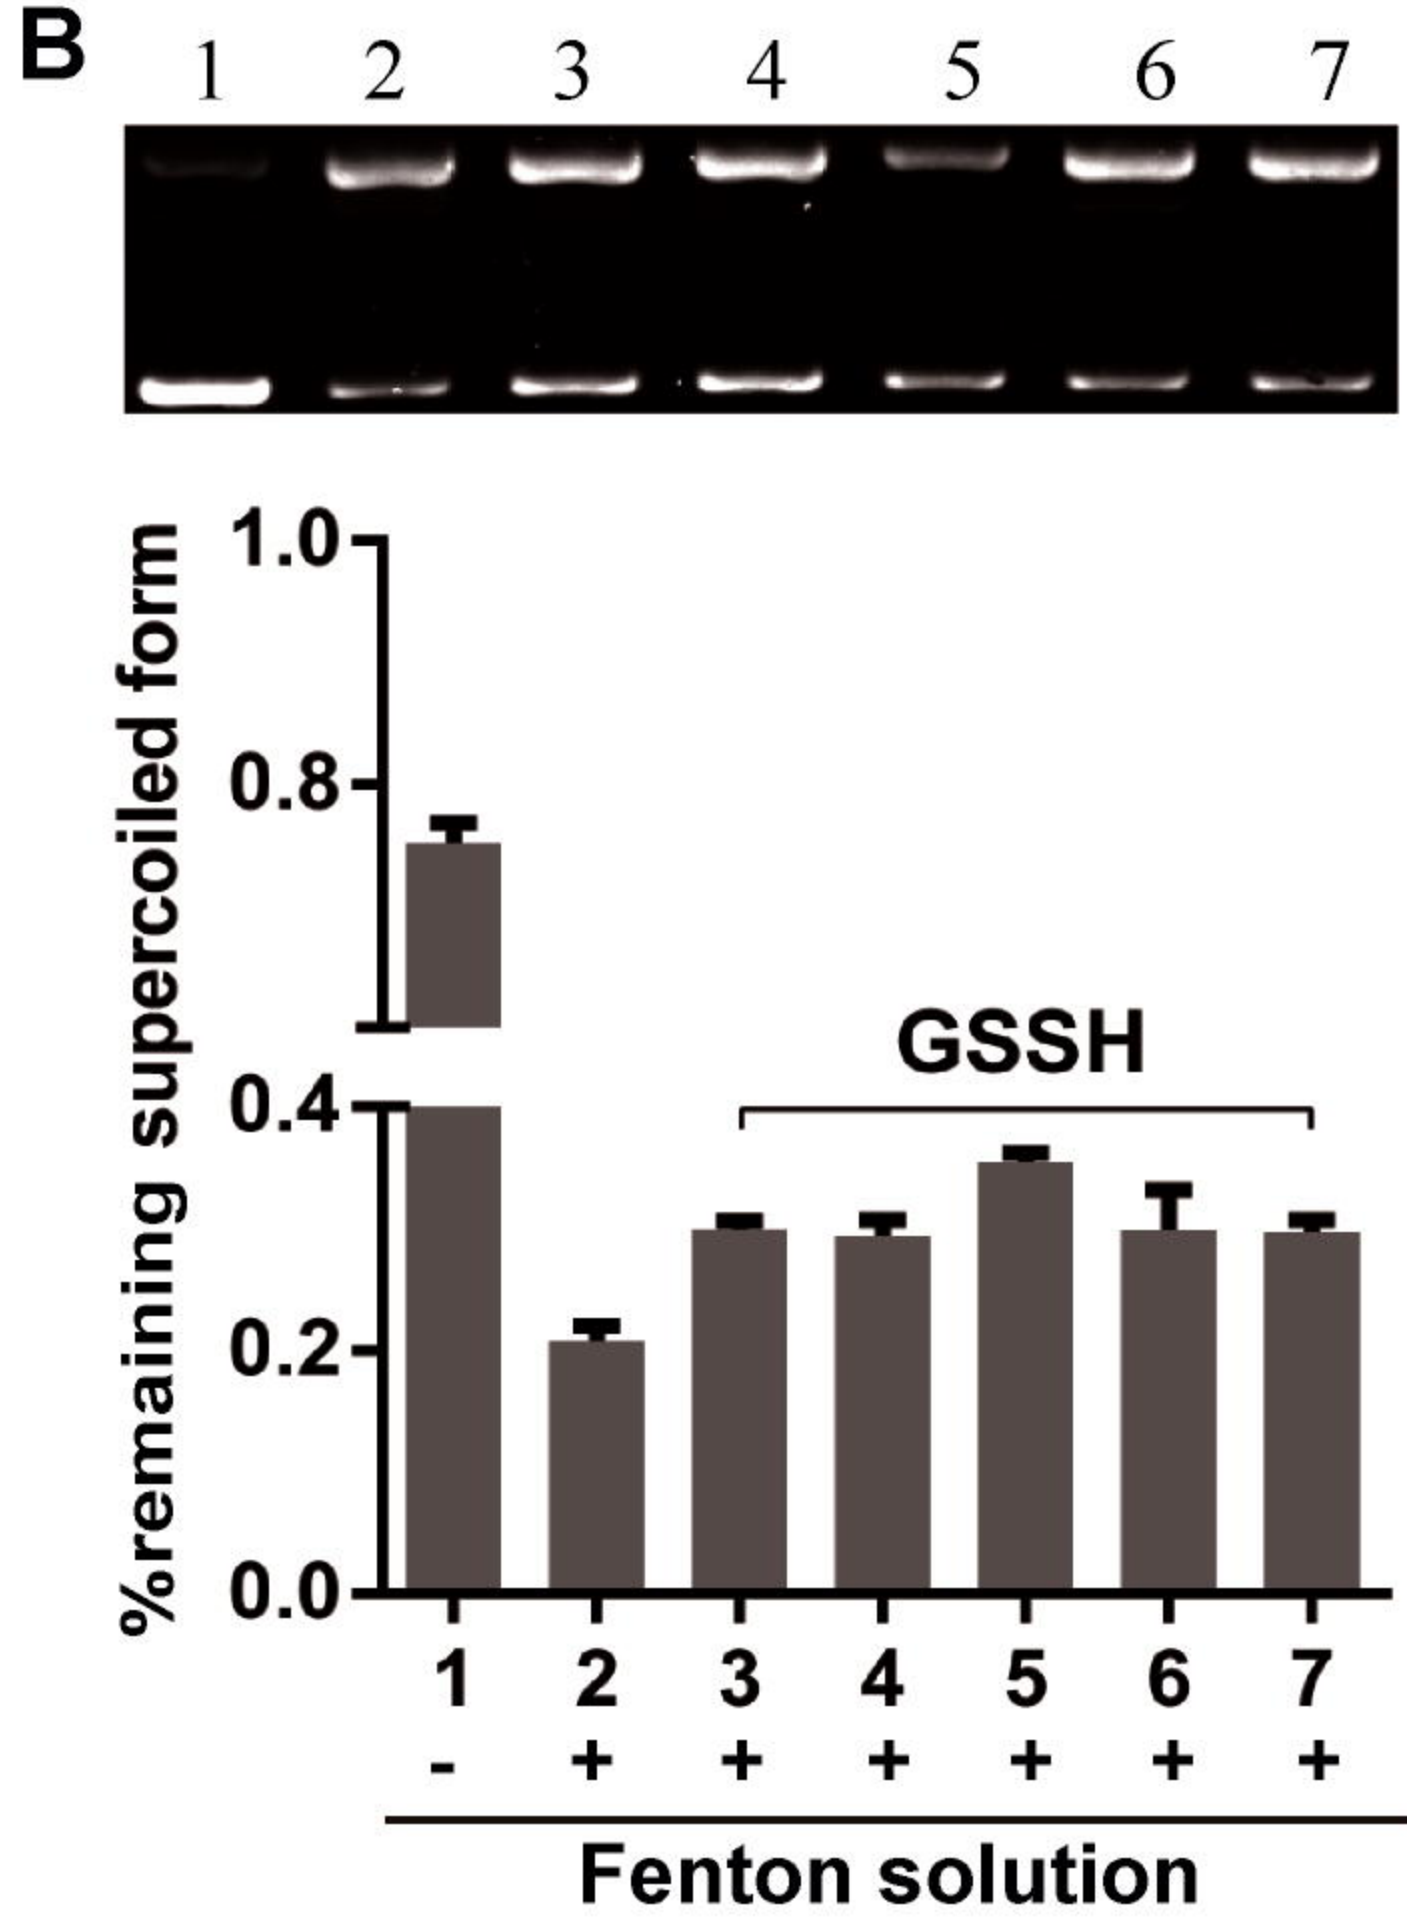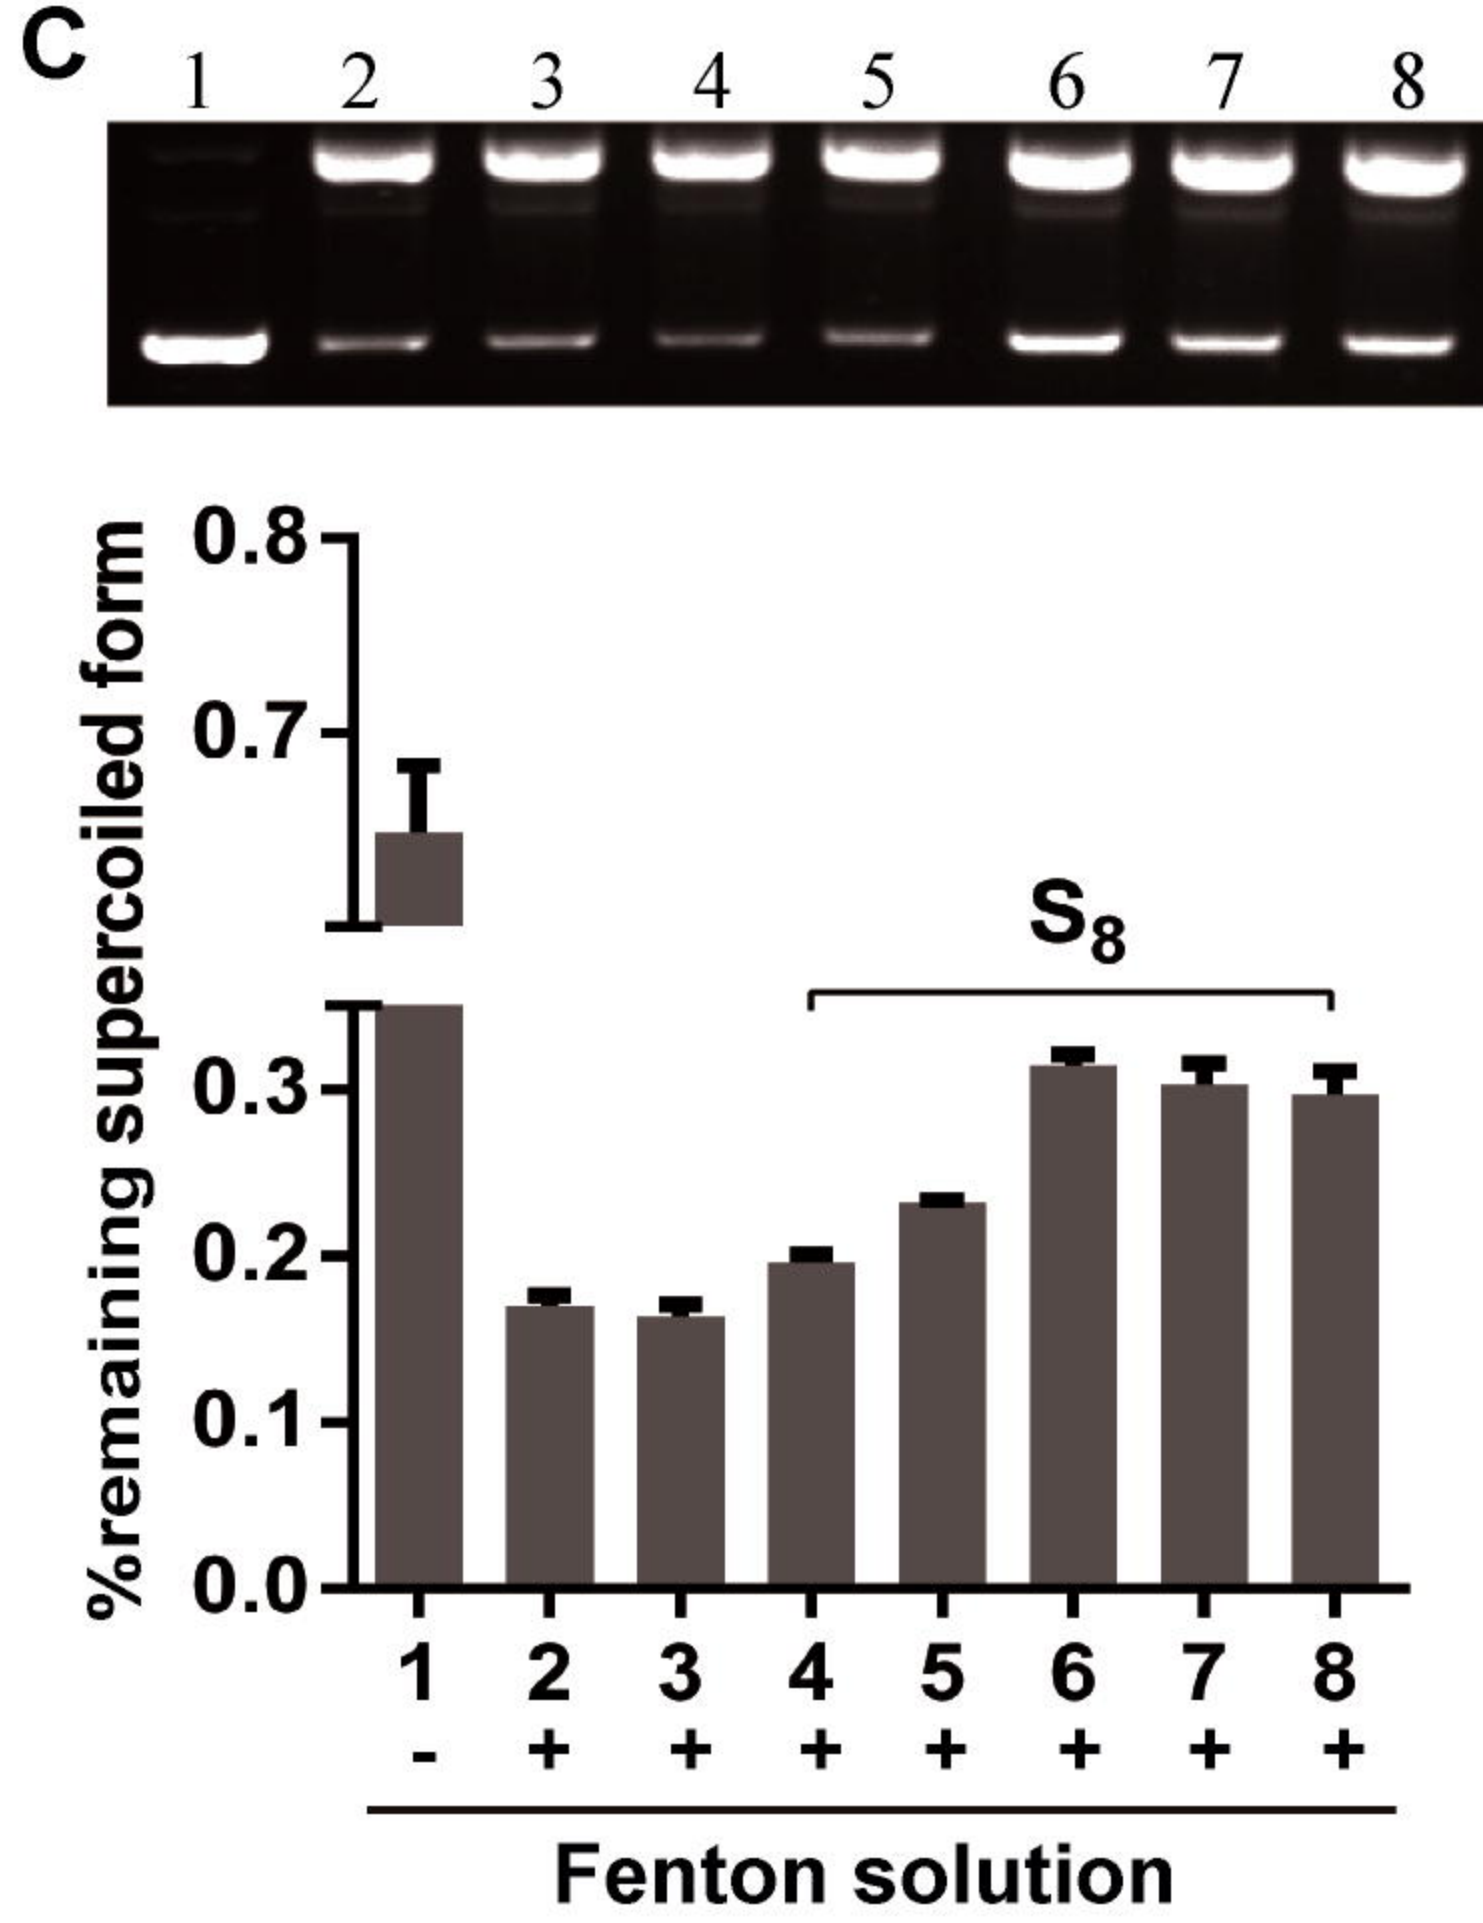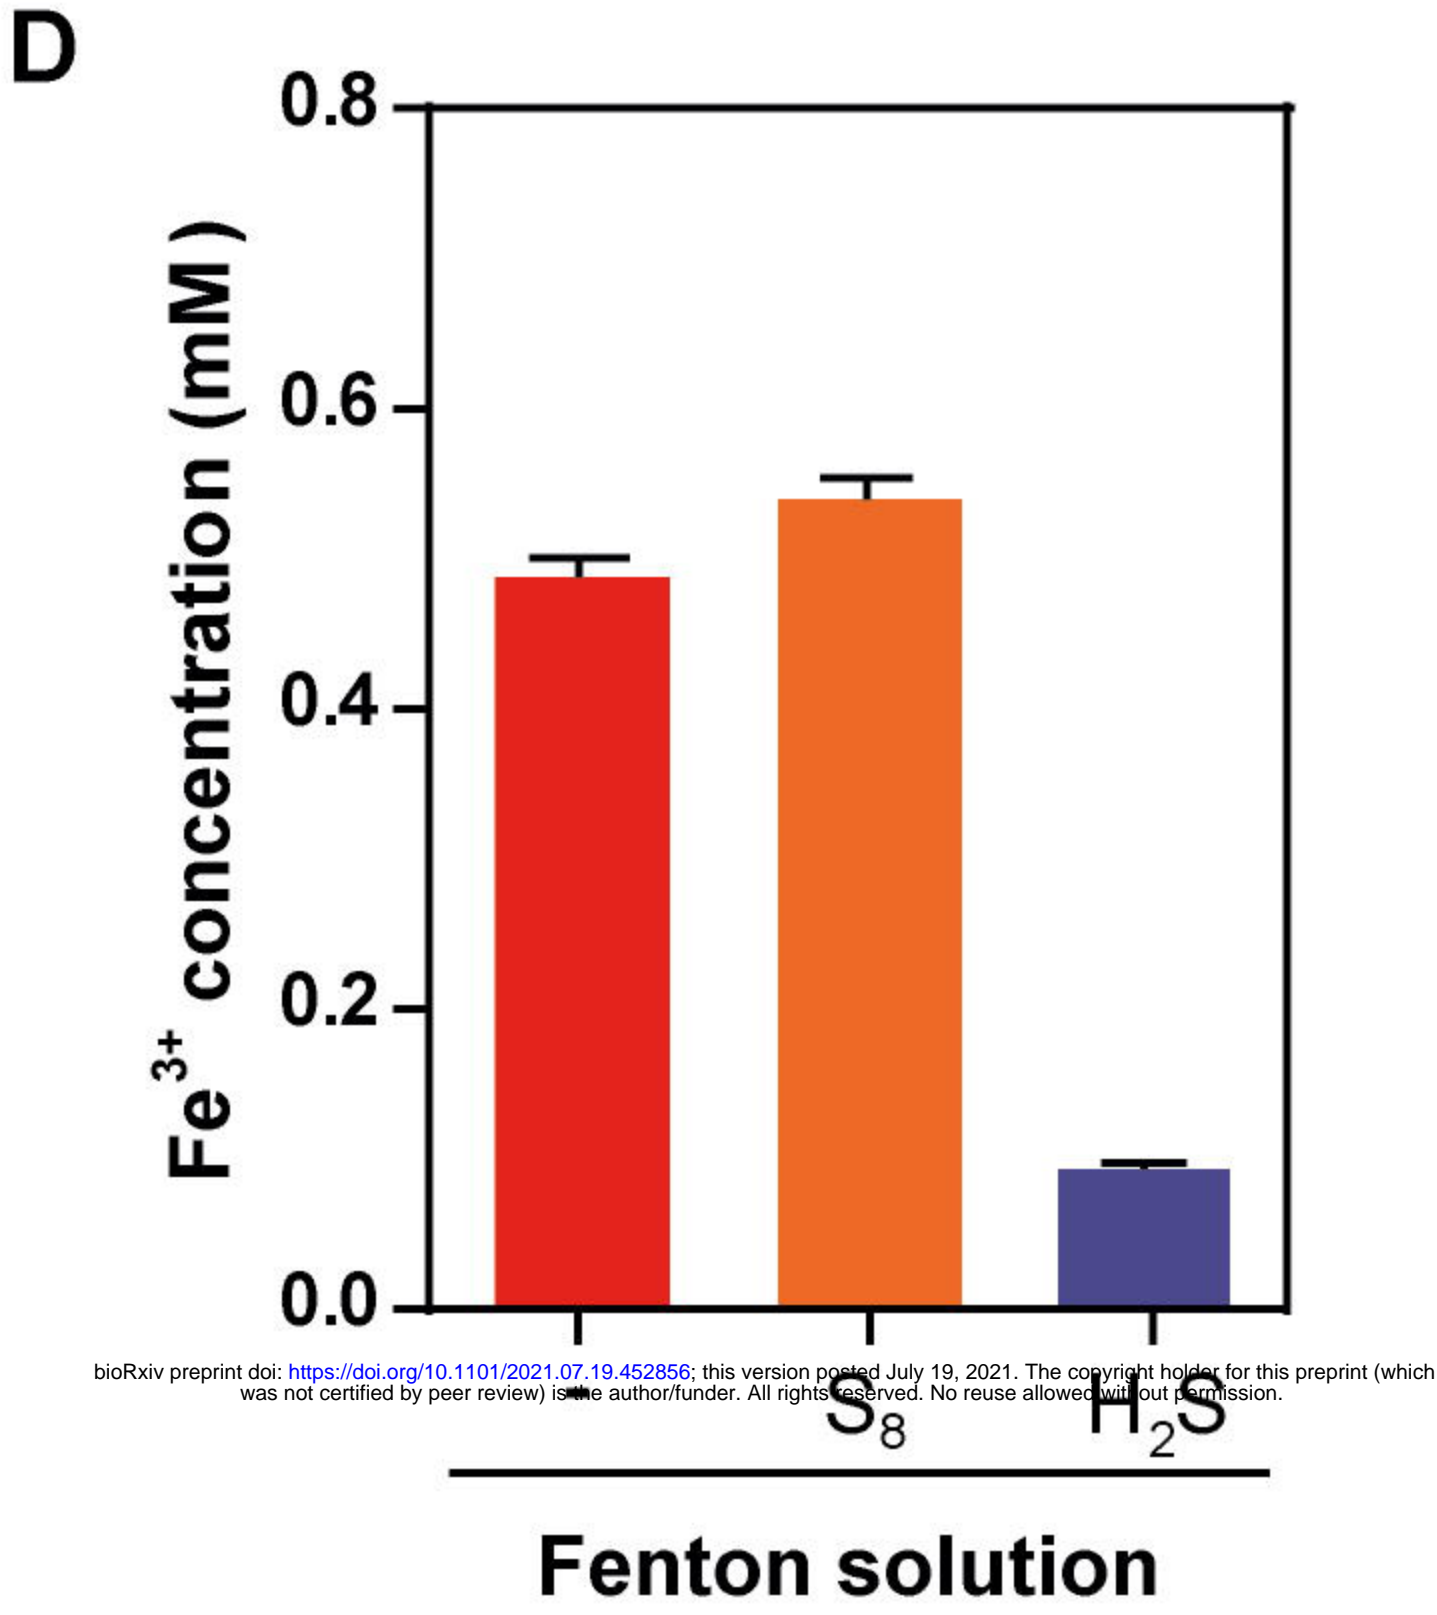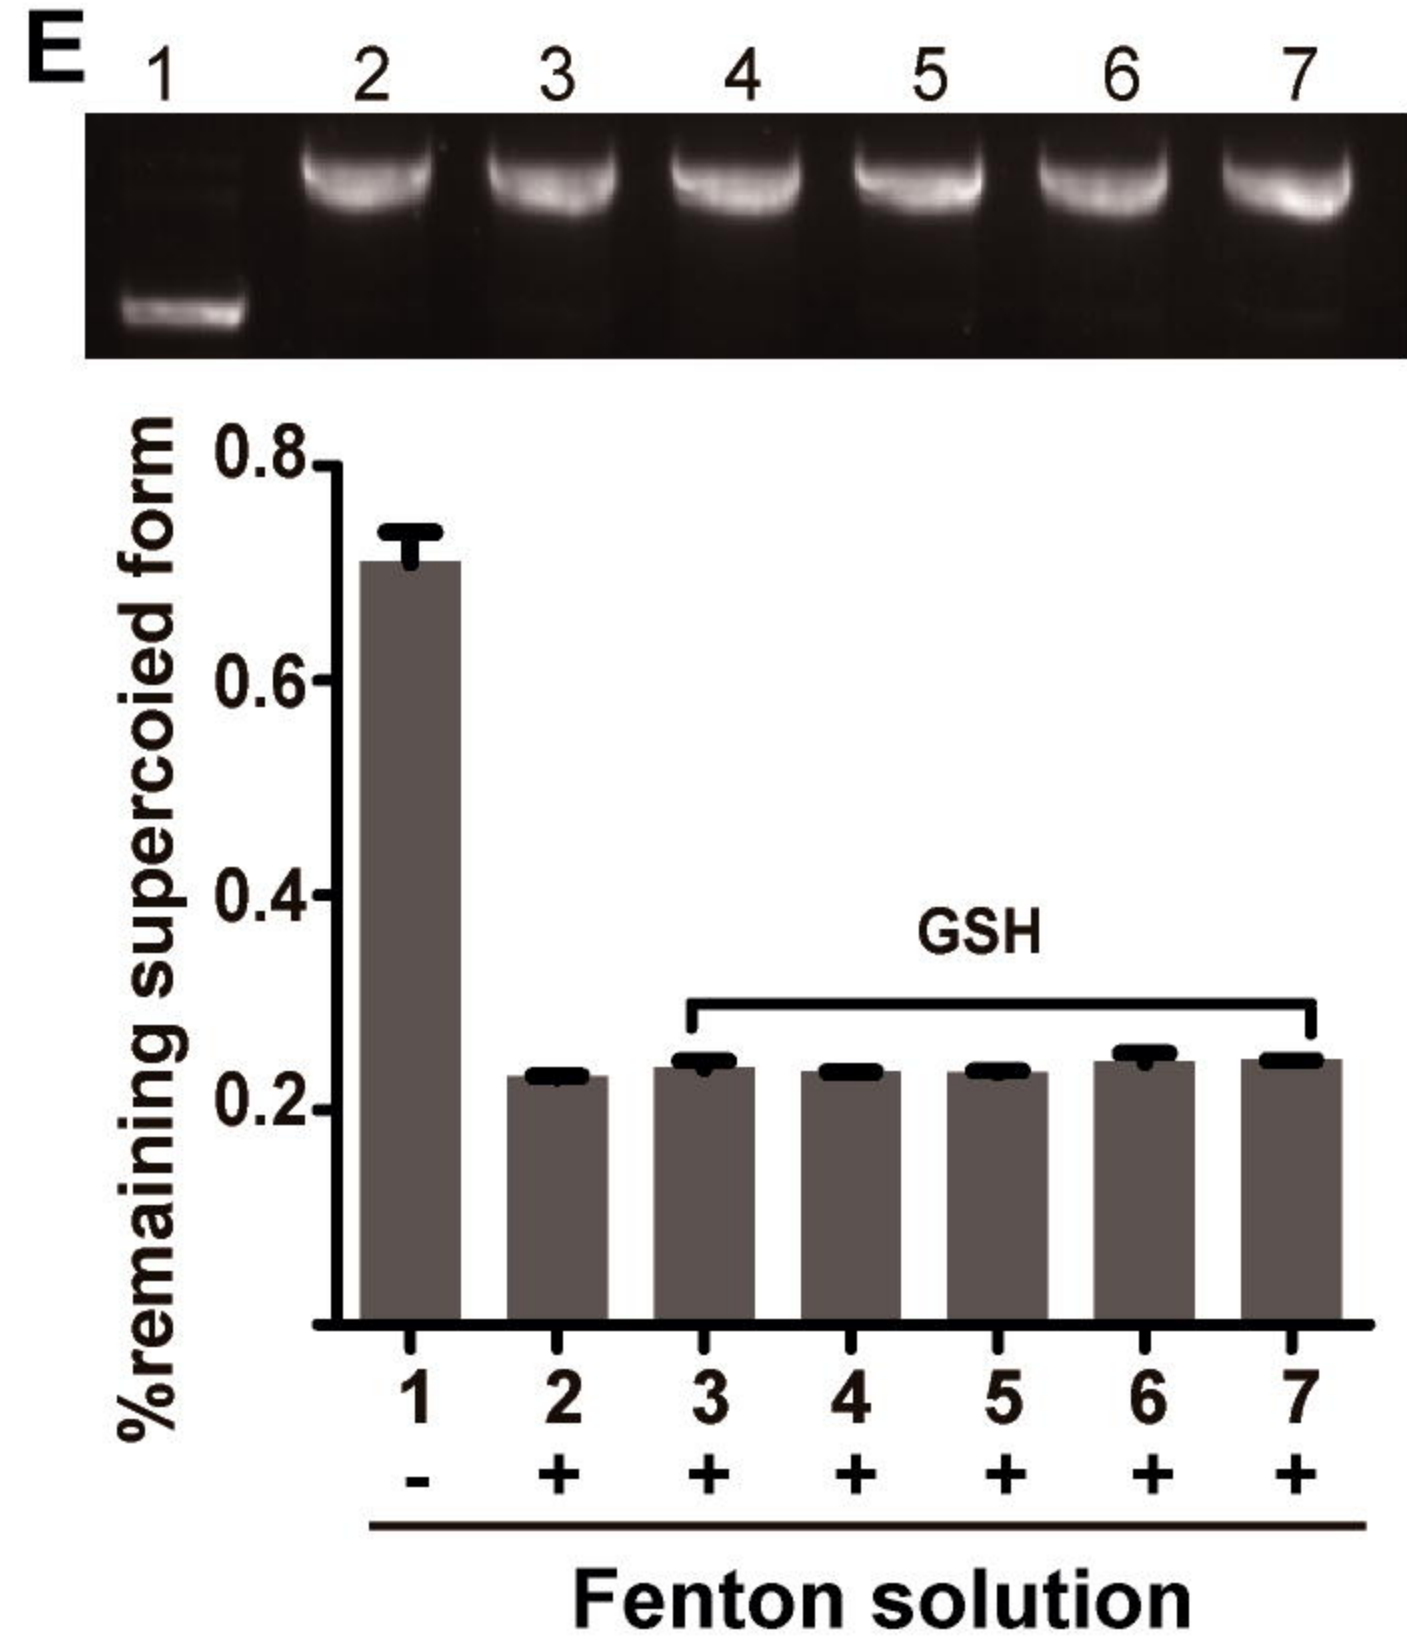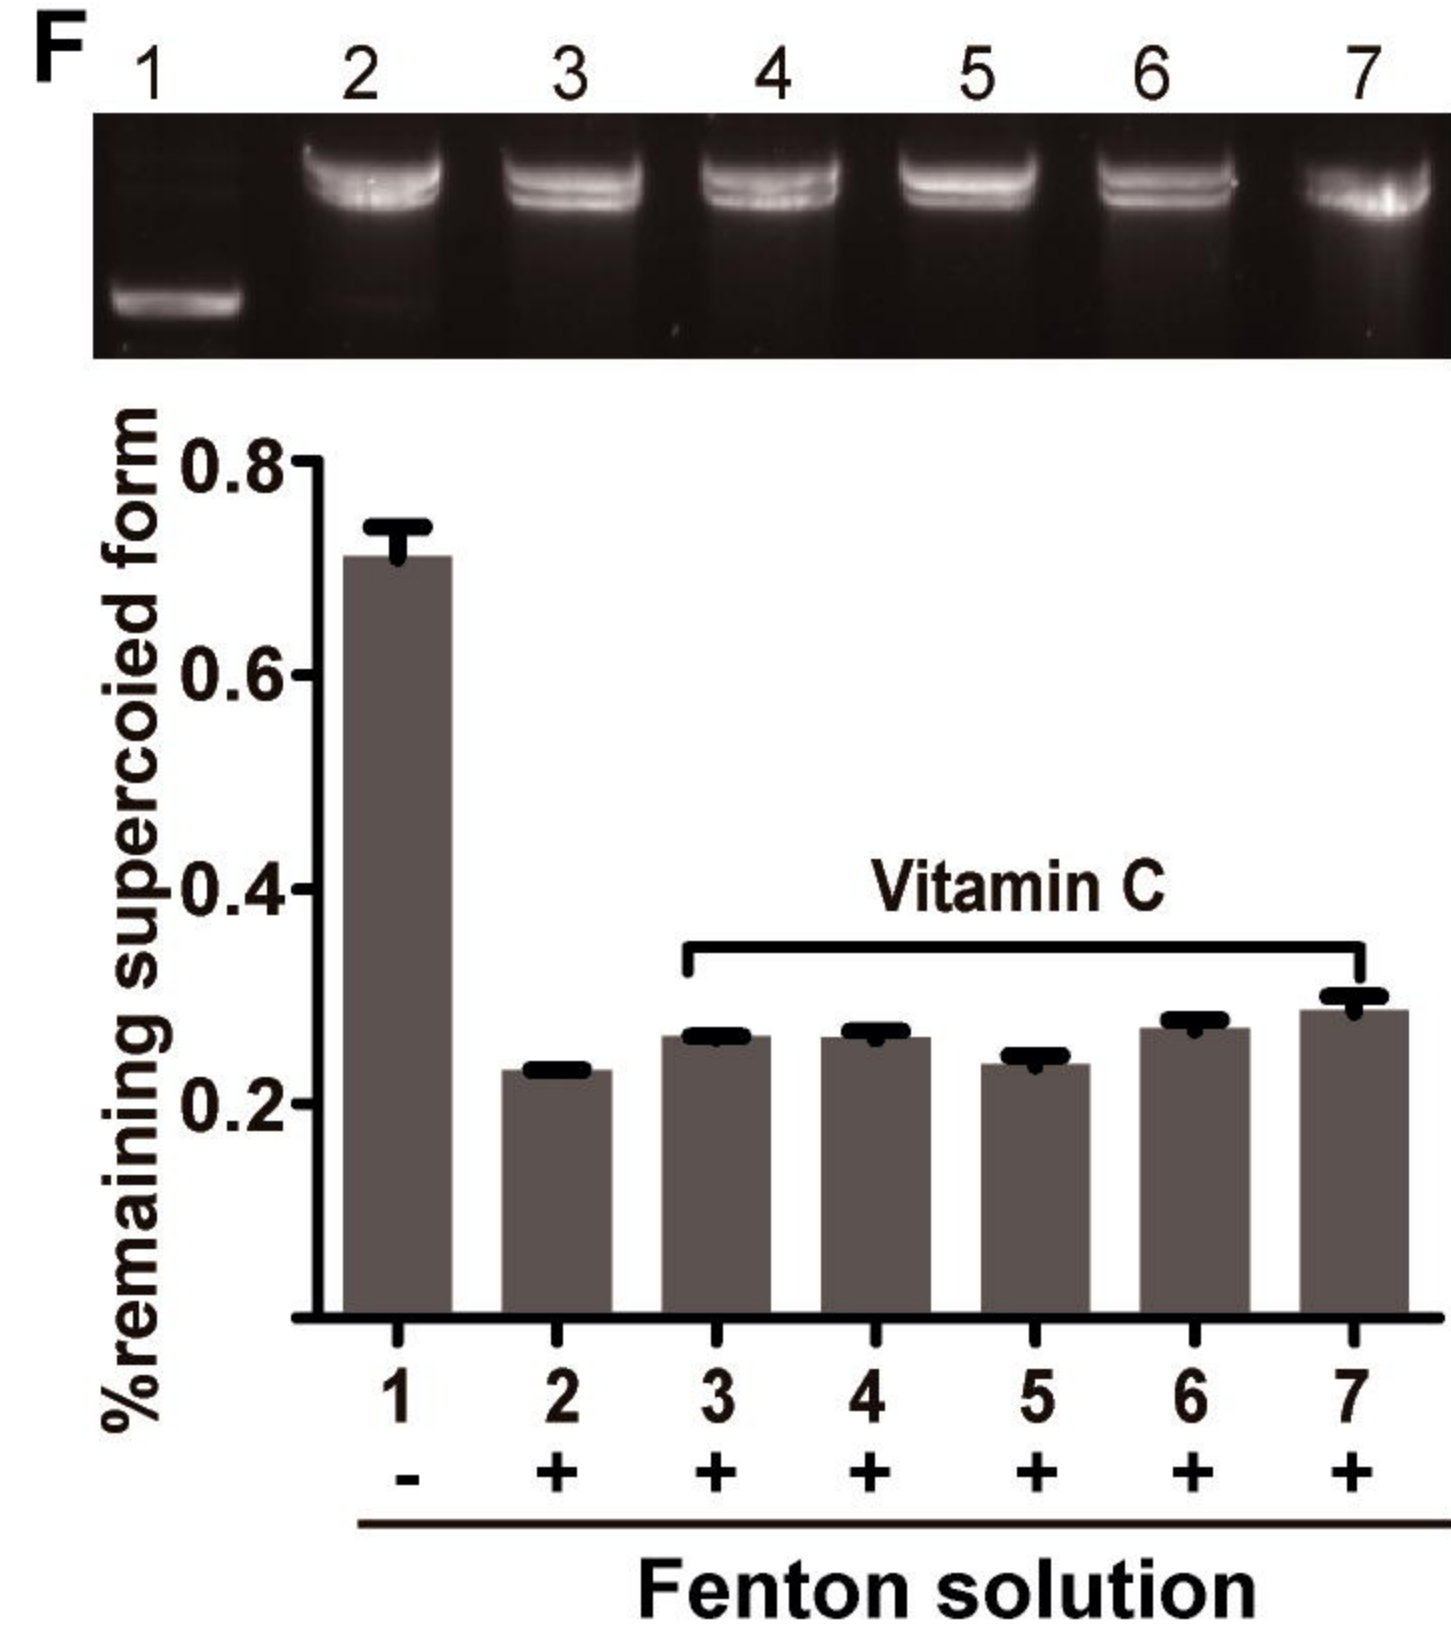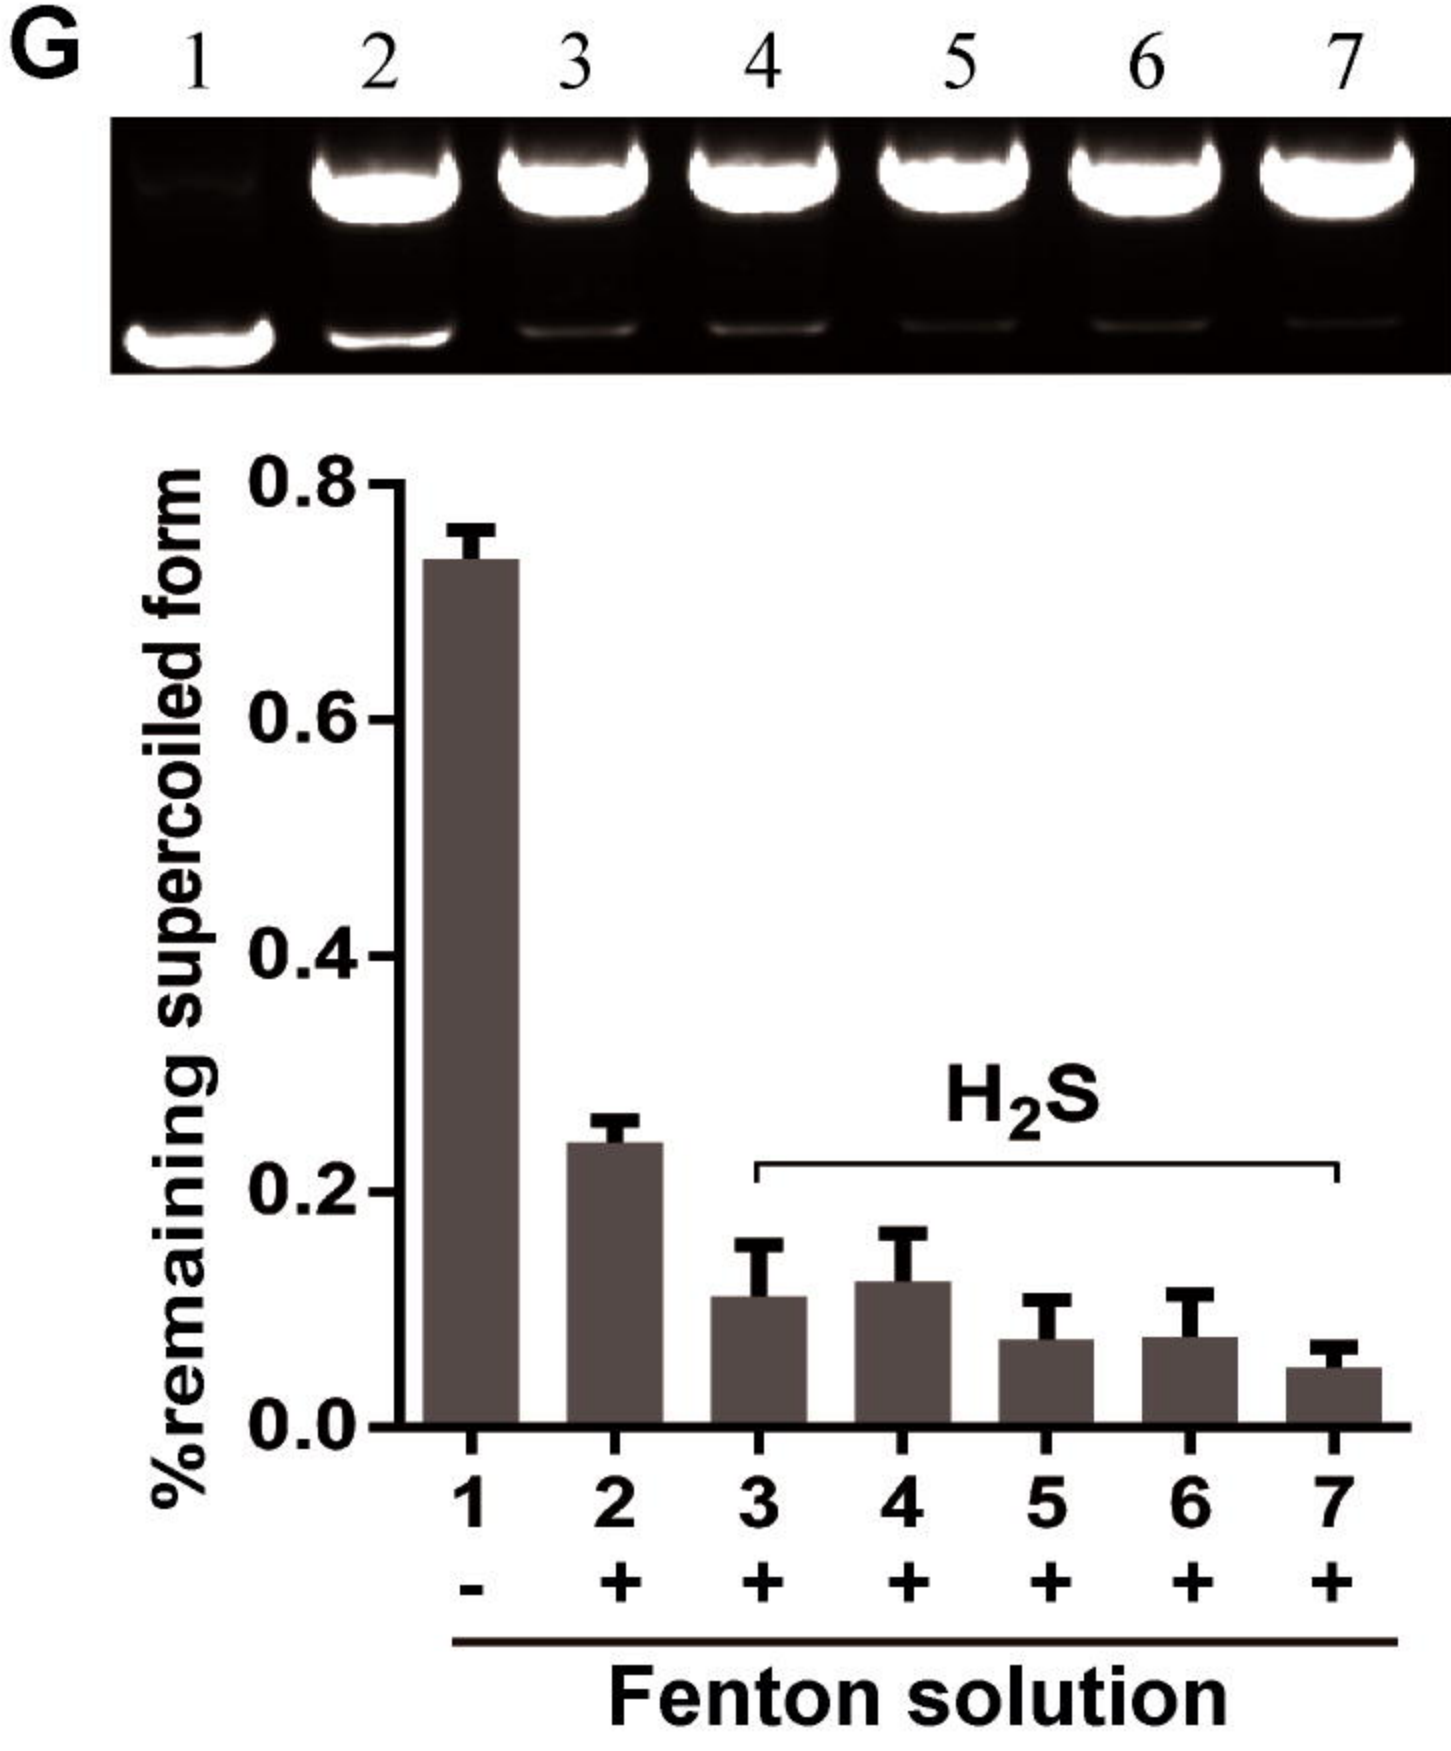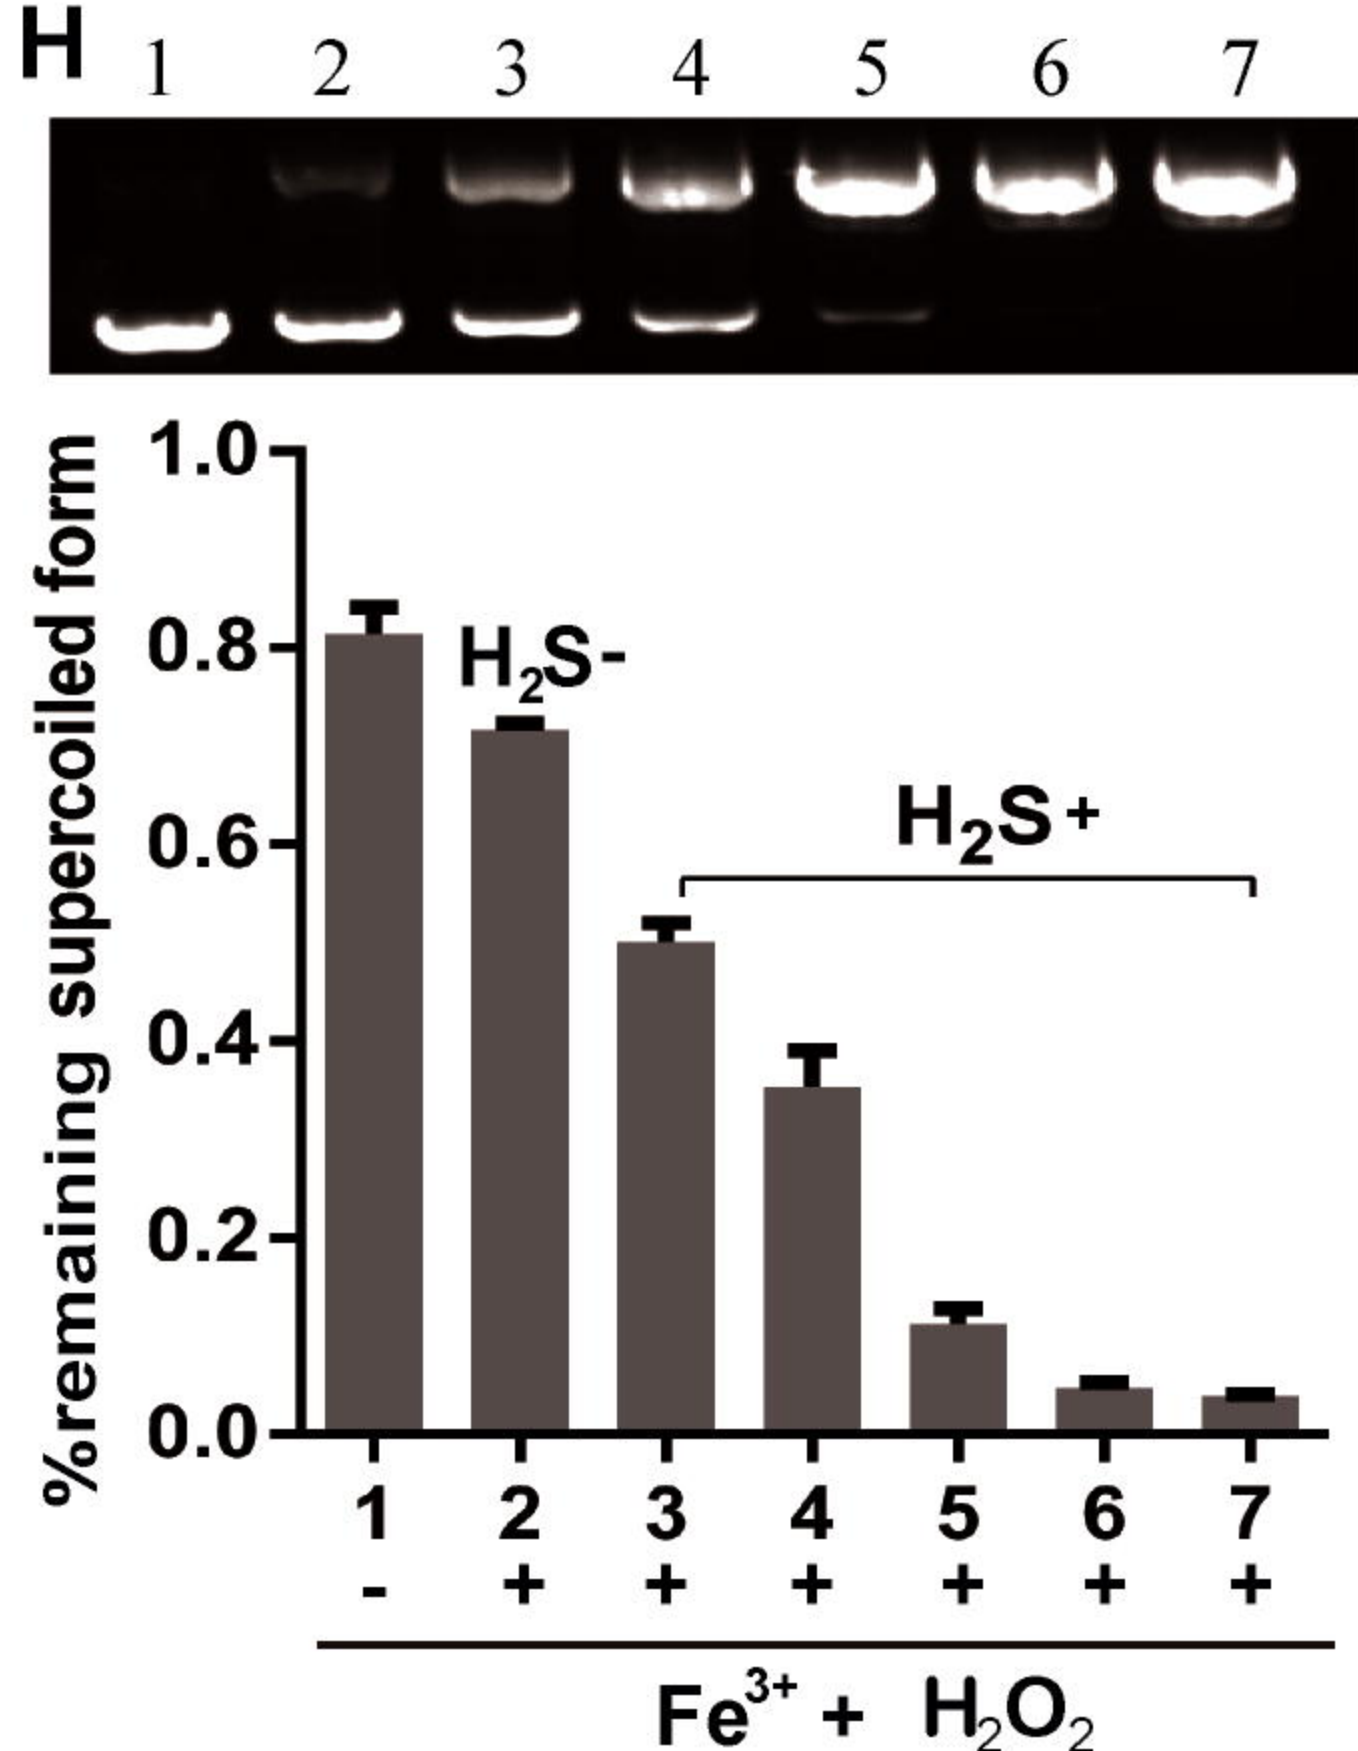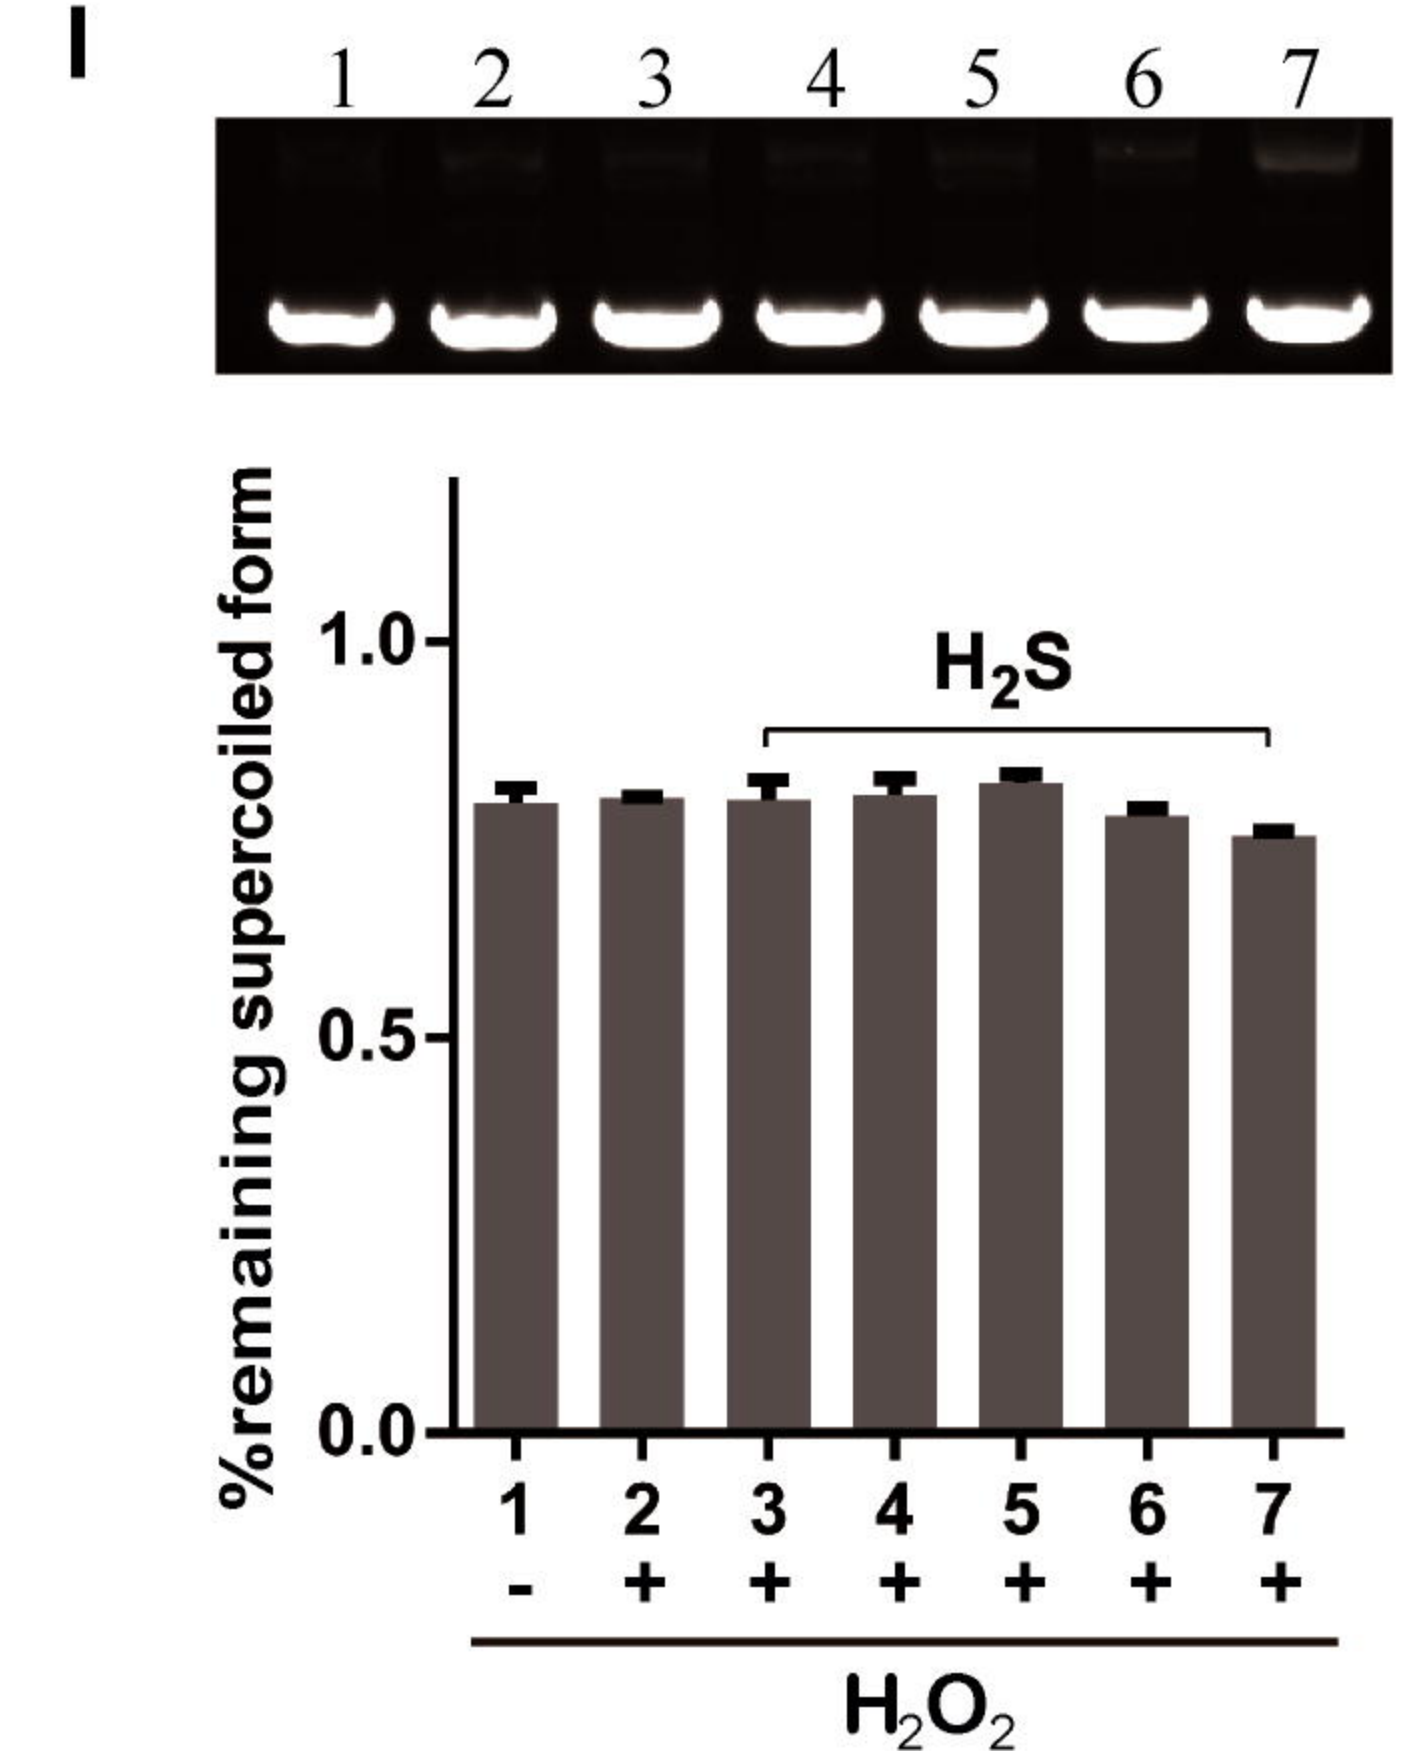



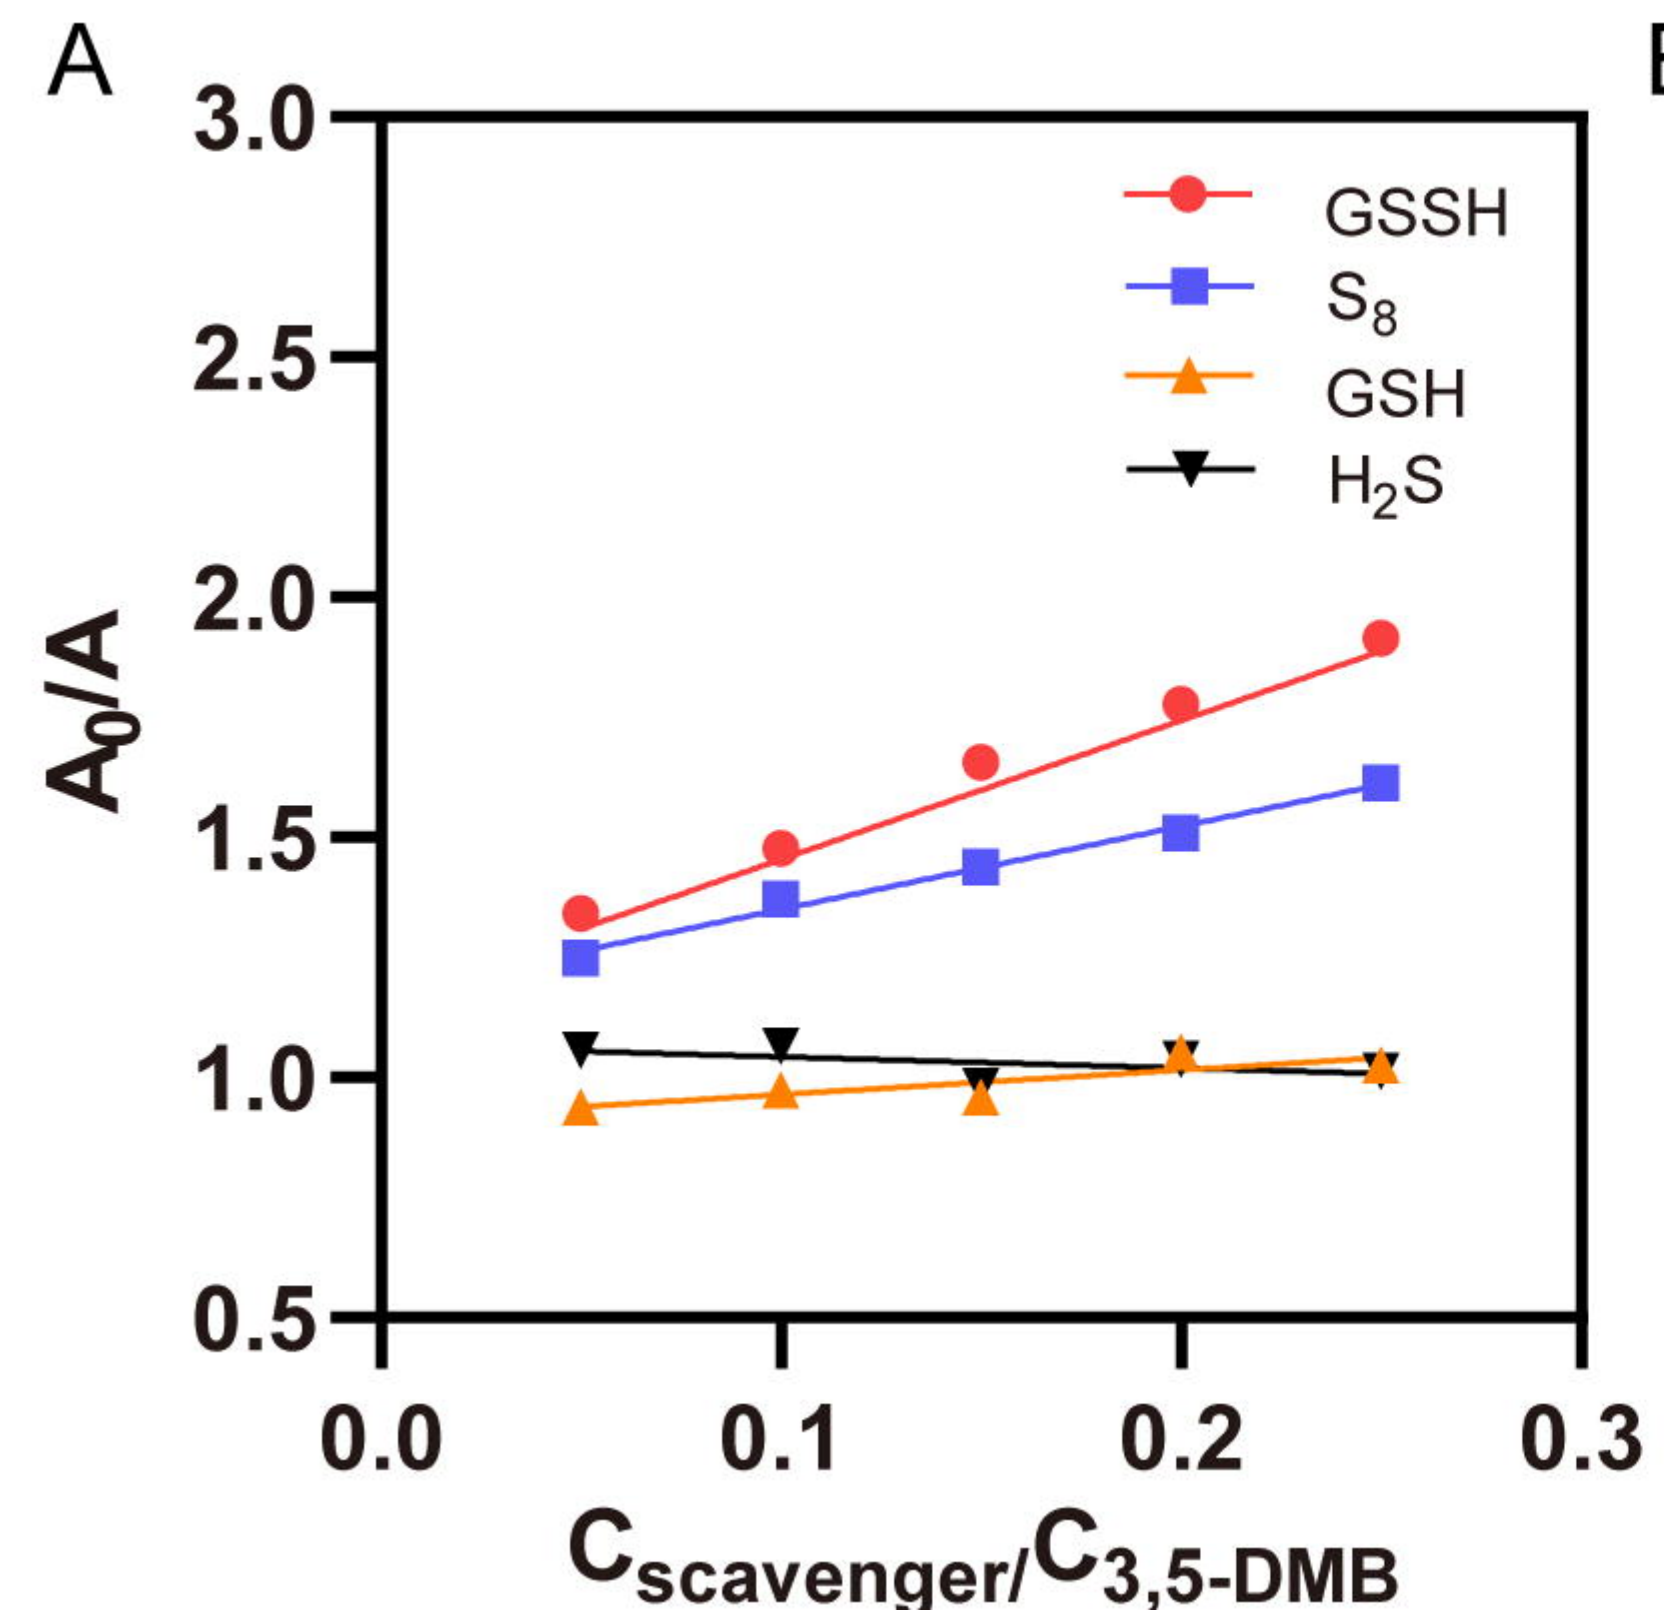

**B**

| HO• scavengers         | Linear equation and correlation coefficient | Rate constant ( $M^{-1} s^{-1}$ ) |
|------------------------|---------------------------------------------|-----------------------------------|
| GSSH ( $10^{-3} M$ )   | $y = 2.8917x + 1.1652$ $r: 0.9966$          | $13.32 \times 10^9$               |
| $S_8$ ( $10^{-3} M$ )  | $y = 1.7703x + 1.1753$ $r: 0.991$           | $8.15 \times 10^9$                |
| GSH ( $10^{-3} M$ )    | $y = 0.5916x + 0.9015$ $r: 0.9552$          | $2.71 \times 10^9$                |
| $H_2S$ ( $10^{-3} M$ ) | $y = -0.2338x + 1.0666$ $r: 0.2977$         | -                                 |

<https://doi.org/10.1101/2021.07.19.452856>



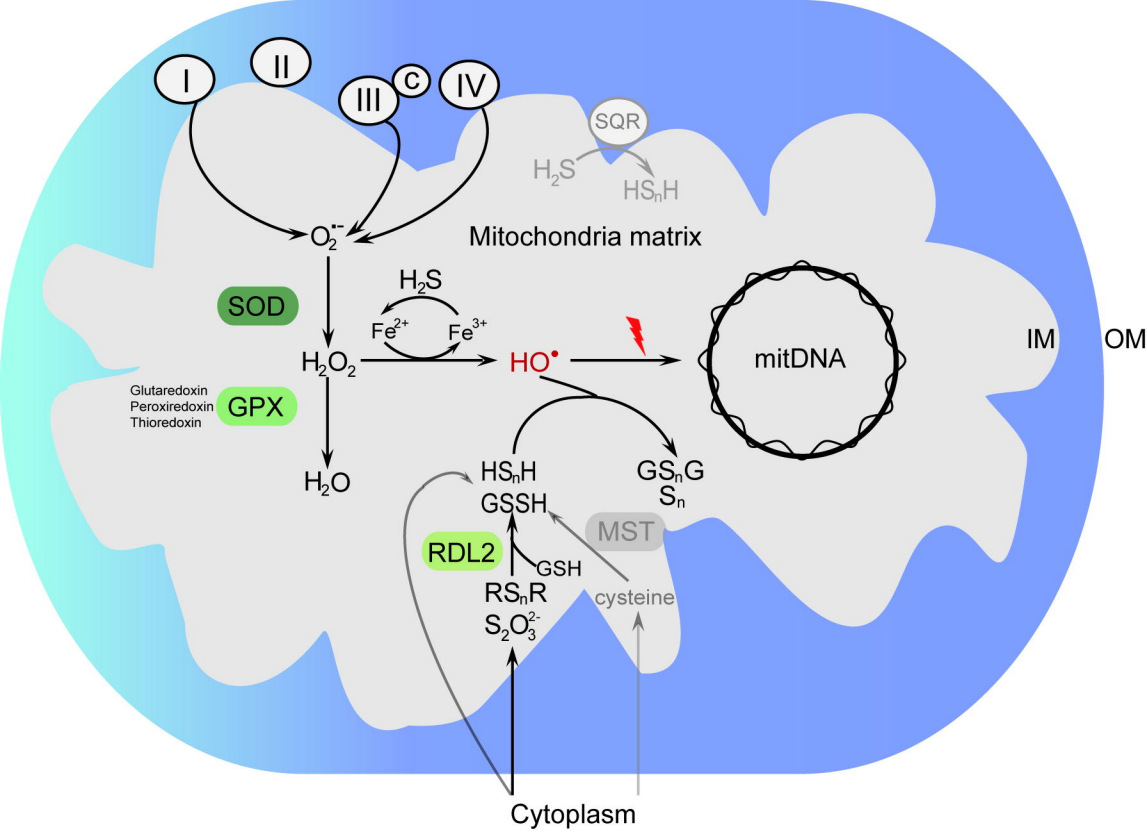

Source: https://www.biorxiv.org/content/10.1101/2021.07.19.452856v1.full.pdf
